# Supplementary material
Source: MDPI journal article supplement (https://www.mdpi.com/2073-4395/12/2/444)
Supplement: s1 [file s1]

Archive with 4 entries (4 files):
- Figure S1.pdf
- Figure S2.pdf
- Table S1 proof.xlsx
- Table S2 proof.xlsx
