# Supplementary material
Source: MDPI journal article supplement (https://www.mdpi.com/2073-4395/12/2/444)

**Figure S2** All *H. vastatrix* DEGs were analyzed by blastx and the species of first hit of each DEG was retrieved.

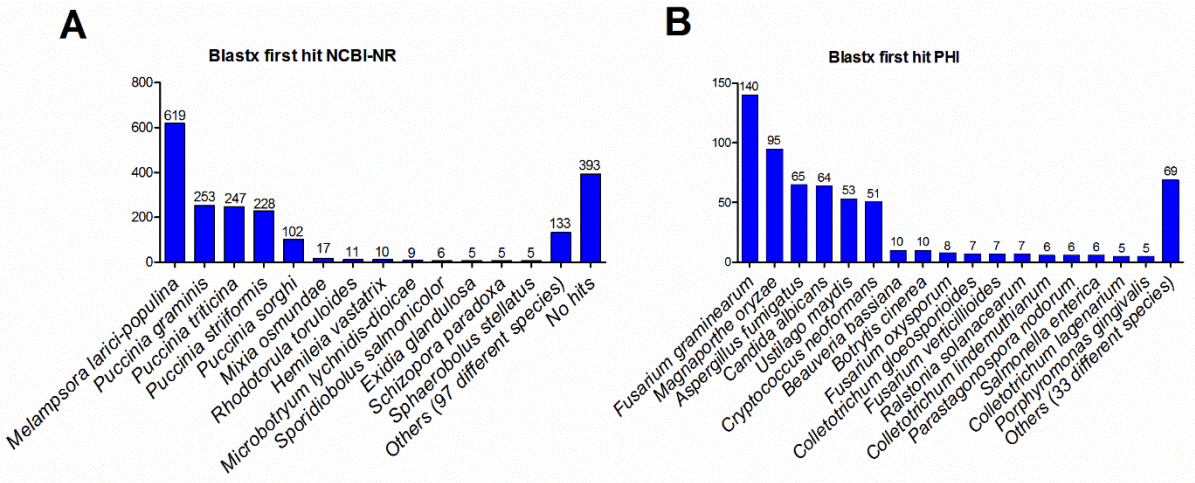

Supplement: s1 [file s1]
