# Supplementary material
Source: MDPI journal article supplement (https://www.mdpi.com/2073-4395/12/2/444)

**Figure S1.** Bioinformatic pipeline analysis reads processing, mapping to reference genomes, filtering plant reads from fungi reads, *H. vastatrix* transcriptome assembly and identification of differentially expressed genes in all sequenced libraries.

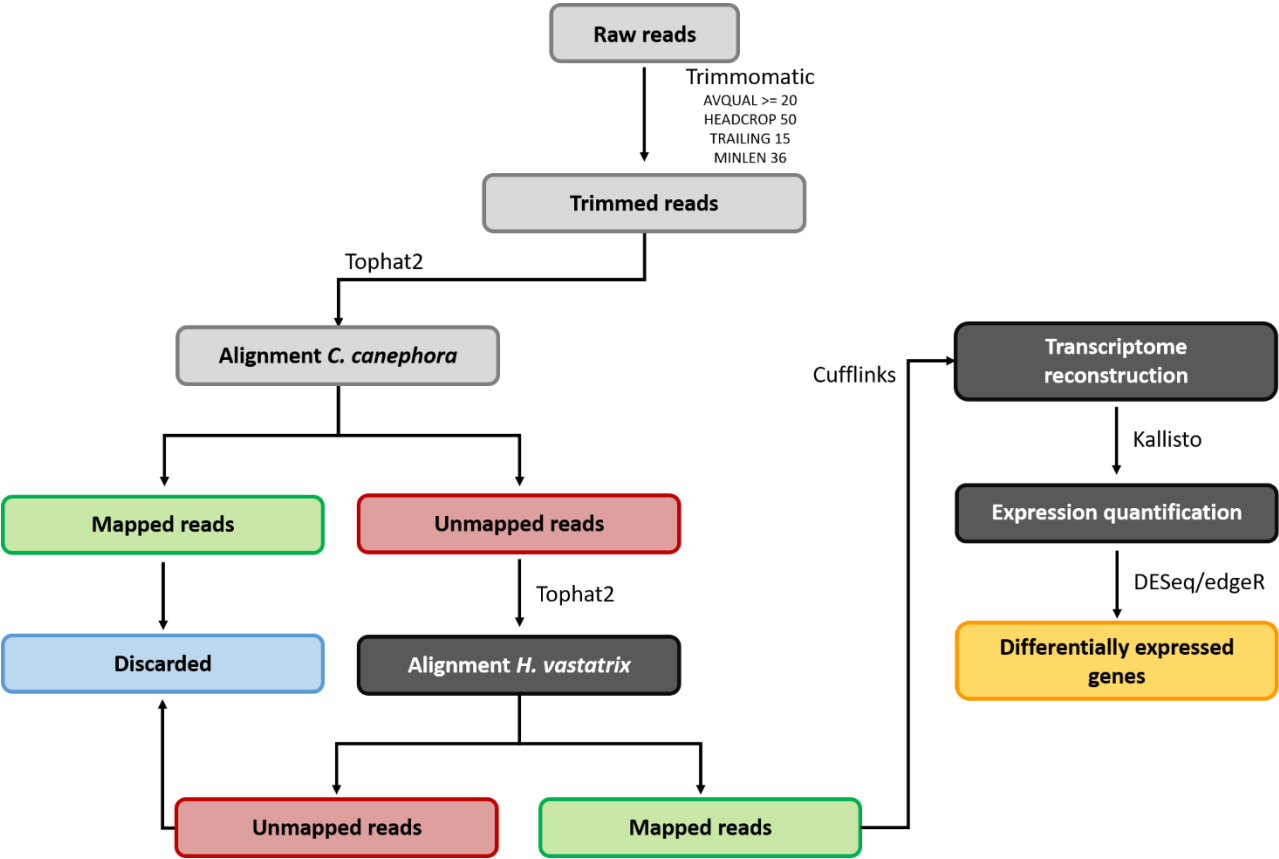

Supplement: s1 [file s1 › Figure S1.pdf]
