# Supplementary material
Source: MDPI journal article supplement (https://www.mdpi.com/2073-4395/12/2/444)
Supplement: s1 [file s1 › Table S1 proof.xlsx]

## Sheet: Planilha1
Table S1. Functional annotation of the identified DEGs in the Hemileia vastatrix transcriptome
Transcript_ID	Category	Subcategory	Annotation	Secreted	Experiment
1220	Amino sugar and nucleotide sugar metabolism		UDP-N-acetylglucosamine pyrophosphorylase		R12_xPool_down	RxS_12_up
5121	Amino sugar and nucleotide sugar metabolism		Mannose-1-phosphate guanyltransferase		R12_xPool_up	R24_xPool_up	RxS_24_down	S12_xPool_up
9011	Amino sugar and nucleotide sugar metabolism		UTP--glucose-1-phosphate uridylyltransferase		R12_xPool_up	R24_xPool_up	S12_xPool_up
16370	Amino sugar and nucleotide sugar metabolism		Glucose-6-phosphate dehydrogenase		RxS_12_up
1224	Amino sugar and nucleotide sugar metabolism		UDP-N-acetylglucosamine pyrophosphorylase		RxS_12_up
26249	Amino sugar and nucleotide sugar metabolism		UDP-glucose:glycoprotein glucosyltransferase 2	Secreted	RxS_96_up
13451	Amino sugar and nucleotide sugar metabolism		GDP-mannose 4,6 dehydratase		S12_xPool_up
21042	Amino sugar and nucleotide sugar metabolism		Glutamine--fructose-6-phosphate aminotransferase		S17d_xPool_up
11137	Carbohydrate metabolism	Carbohydrate degradation	Mannosidase (GH47)		R12_xPool_down
2576	Carbohydrate metabolism	Carbohydrate degradation	α-1,3-glucanase (GH71)		R12_xPool_down	S17d_xPool_down	S96_xPool_down
23106	Carbohydrate metabolism	Krebs Cycle	aconitase		R12_xPool_down	S12_xPool_down
11476	Carbohydrate metabolism	Krebs Cycle	oxoglutarate dehydrogenase		R12_xPool_down	R24_xPool_down	RxS_24_up	S12_xPool_down
8467	Carbohydrate metabolism		Beta-glucan synthesis-associated protein (SKN1)		R12_xPool_down	R17d_xPool_down	R24_xPool_down	S12_xPool_down	S24_xPool_down
17645	Carbohydrate metabolism		Maltose acetyltransferase		R12_xPool_down	RxS_12_up
21758	Carbohydrate metabolism	Carbohydrate degradation	endo-β-1,3-1,4-glucanase (GH26)		R12_xPool_up	R24_xPool_up	S12_xPool_up
24050	Carbohydrate metabolism	Carbohydrate degradation	Glycosyl hydrolases family 31	Secreted	R12_xPool_up	R24_xPool_up	S12_xPool_up
24051	Carbohydrate metabolism	Carbohydrate degradation	Glycosyl hydrolases family 31	Secreted	R12_xPool_up	RxS_24_up	S24_xPool_up
24054	Carbohydrate metabolism	Carbohydrate degradation	Glycosyl hydrolases family 31		R12_xPool_up	S12_xPool_up
6400	Carbohydrate metabolism	Carbohydrate degradation	xylanase/arabinase (GH43)	Secreted	R12_xPool_up	S12_xPool_up
17926	Carbohydrate metabolism	Carbohydrate degradation	Α-glucosidase (GH63)		R12_xPool_up	S12_xPool_up	S17d_xPool_up	S24_xPool_up
8163	Carbohydrate metabolism	Glycolysis	Glyceraldehyde 3-phosphate dehydrogenase		R12_xPool_up	R96_xPool_up	RxS_24_up	S12_xPool_up	S17d_xPool_up	S24_xPool_up	S96_xPool_up
21753	Carbohydrate metabolism		Galactosyltransferase		R12_xPool_up	RxS_12_down
1894	Carbohydrate metabolism		glycosyl transferase family 48		R12_xPool_up	R24_xPool_up	R96_xPool_up	S17d_xPool_up	S96_xPool_up
18146	Carbohydrate metabolism		Glycosyl transferase family 90		R12_xPool_up	R17d_xPool_up	R24_xPool_up	R96_xPool_up	S12_xPool_up	S17d_xPool_up	S24_xPool_up	S96_xPool_up
22680	Carbohydrate metabolism		Glycosyl transferase family 90		R12_xPool_up	R24_xPool_up	RxS_12_down	RxS_24_down	S17d_xPool_up
18285	Carbohydrate metabolism	Carbohydrate biosynthesis	Chitin synatase		R24_xPool_down
2880	Carbohydrate metabolism	Lipid glycosilation	Alg9-like mannosyltransferase family		R24_xPool_down
18745	Carbohydrate metabolism		Trehalase		R24_xPool_down	RxS_24_up
21790	Carbohydrate metabolism	Carbohydrate degradation	Alpha-L-arabinofuranosidase		R24_xPool_up	S24_xPool_up
17924	Carbohydrate metabolism	Carbohydrate degradation	Α-glucosidase (GH63)		R24_xPool_up	S12_xPool_up	S17d_xPool_up
938	Carbohydrate metabolism	Fructose/Mannose/Galactose	NADP-dependent mannitol dehydrogenase		R24_xPool_up
12786	Carbohydrate metabolism	Krebs Cycle	oxoglutarate dehydrogenase		R24_xPool_up	S17d_xPool_up
16263	Carbohydrate metabolism		glycosyl hydrolase	Secreted	R24_xPool_up	S17d_xPool_up	S24_xPool_up
9413	Carbohydrate metabolism	Carbohydrate degradation	Glycosyl hydrolases family 31		R96_xPool_down	RxS_96_up
22679	Carbohydrate metabolism		Glycosyl transferase family 90		R96_xPool_down	RxS_96_up
23026	Carbohydrate metabolism	Carbohydrate degradation	Mannosidase (GH47)		R96_xPool_up	RxS_96_down
12457	Carbohydrate metabolism		3-beta-glucosyltransferase		R96_xPool_up	RxS_96_down
6622	Carbohydrate metabolism	Carbohydrate degradation	Glycosyl hydrolases family 16	Secreted	RxS_12_down	S12_xPool_down
24052	Carbohydrate metabolism	Carbohydrate degradation	Glycosyl hydrolases family 31	Secreted	RxS_12_down	RxS_24_down	S12_xPool_down	S24_xPool_down
26510	Carbohydrate metabolism	Carbohydrate degradation	α-1,6-mannanase (GH76)	Secreted	RxS_12_down
1351	Carbohydrate metabolism	Glycolysis	Phosphoglycerate kinase		RxS_12_down
11479	Carbohydrate metabolism	Krebs Cycle	oxoglutarate dehydrogenase		RxS_12_down
18209	Carbohydrate metabolism	N-linked protein glycosylation	family 57 glycosyltransferase		RxS_12_down	RxS_24_down	RxS_96_down
1350	Carbohydrate metabolism	Glycolysis	Phosphoglycerate kinase		RxS_12_up	RxS_96_up	S12_xPool_up	S17d_xPool_up	S24_xPool_up	S96_xPool_up
9586	Carbohydrate metabolism	Krebs Cycle	Citrate synthase		RxS_12_up	S12_xPool_up
21845	Carbohydrate metabolism	Lipid glycosilation	Alg9-like mannosyltransferase family		RxS_12_up
7718	Carbohydrate metabolism		3-beta-glucuronosyltransferase		RxS_12_up
12625	Carbohydrate metabolism		glycosyl transferase		RxS_12_up	RxS_24_down
15576	Carbohydrate metabolism		glycosyltransferase family 90		RxS_12_up
17648	Carbohydrate metabolism		Maltose acetyltransferase		RxS_12_up
29613	Carbohydrate metabolism	Carbohydrate degradation	Alpha galactosidase A		RxS_24_down
890	Carbohydrate metabolism	Carbohydrate degradation	Cellulase (glycosyl hydrolase family 5)		RxS_24_down
3773	Carbohydrate metabolism	Carbohydrate degradation	Cellulase (glycosyl hydrolase family 5)		RxS_24_down
1477	Carbohydrate metabolism	Carbohydrate degradation	Glycosyl hydrolase family 79		RxS_24_down	RxS_96_down
5489	Carbohydrate metabolism	Carbohydrate degradation	mannosidase (GH43)		RxS_24_down
26512	Carbohydrate metabolism	Carbohydrate degradation	α-1,6-mannanase (GH76)	Secreted	RxS_24_down
937	Carbohydrate metabolism	Fructose/Mannose/Galactose	NADP-dependent mannitol dehydrogenase		RxS_24_down
1353	Carbohydrate metabolism	Glycolysis	Phosphoglycerate kinase		RxS_24_down
20369	Carbohydrate metabolism	Glyconeogenesis	Pyruvate carboxylase		RxS_24_down
19880	Carbohydrate metabolism	Glyoxylate cycle	Isocitrate lyase family		RxS_24_down	S24_xPool_down	S96_xPool_down
18881	Carbohydrate metabolism	Krebs Cycle	Citrate synthase		RxS_24_down
14415	Carbohydrate metabolism	Krebs Cycle	fumarate hydratase		RxS_24_down
11477	Carbohydrate metabolism	Krebs Cycle	oxoglutarate dehydrogenase		RxS_24_down	S12_xPool_up
12456	Carbohydrate metabolism		3-beta-glucosyltransferase		RxS_24_down
17744	Carbohydrate metabolism		alpha-trehalose-phosphate synthase		RxS_24_down
20801	Carbohydrate metabolism		Dihydroxyacetone kinase		RxS_24_down
2402	Carbohydrate metabolism		glycosyl transferase		RxS_24_down
11336	Carbohydrate metabolism		Glycosyl transferases 1		RxS_24_down
18744	Carbohydrate metabolism		Trehalase		RxS_24_down
7267	Carbohydrate metabolism	Carbohydrate degradation	Glycogen debranching enzyme, glucanotransferase domain		RxS_24_up
1475	Carbohydrate metabolism	Carbohydrate degradation	Glycosyl hydrolase family 79		RxS_24_up	S24_xPool_up
11136	Carbohydrate metabolism	Carbohydrate degradation	Mannosidase (GH47)		RxS_24_up	S24_xPool_up
26789	Carbohydrate metabolism	Carbohydrate degradation	xylanase (GH10)		RxS_24_up
21846	Carbohydrate metabolism	Lipid glycosilation	Alg9-like mannosyltransferase family		RxS_24_up
12623	Carbohydrate metabolism		glycosyl transferase		RxS_24_up	S17d_xPool_down
1473	Carbohydrate metabolism	Carbohydrate degradation	Glycosyl hydrolase family 79		RxS_96_down
2879	Carbohydrate metabolism	Lipid glycosilation	Alg9-like mannosyltransferase family		RxS_96_down
28022	Carbohydrate metabolism		glycosidase	Secreted	RxS_96_down
27881	Carbohydrate metabolism		Glycosyl transferase family 4		RxS_96_down
18147	Carbohydrate metabolism		Glycosyl transferase family 90		RxS_96_down	S96_xPool_down
26507	Carbohydrate metabolism	Carbohydrate degradation	α-1,6-mannanase (GH76)	Secreted	RxS_96_up
939	Carbohydrate metabolism	Fructose/Mannose/Galactose	NADP-dependent mannitol dehydrogenase		RxS_96_up
1897	Carbohydrate metabolism		1,3 beta glucan synthase		RxS_96_up	S17d_xPool_down
27880	Carbohydrate metabolism		Glycosyl transferase family 4		RxS_96_up
13009	Carbohydrate metabolism	Carbohydrate degradation	α-1,3-glucanase (GH71)		S12_xPool_down
23319	Carbohydrate metabolism	Glycolysis	Glucose-6-phosphate isomerase		S12_xPool_down
9197	Carbohydrate metabolism	Glycolysis	Phosphofructokinase		S12_xPool_down	S17d_xPool_down
1191	Carbohydrate metabolism	Glycolysis	Glyceraldehyde 3-phosphate dehydrogenase		S12_xPool_up	S24_xPool_up
6509	Carbohydrate metabolism		fucosyltransferase		S12_xPool_up
2568	Carbohydrate metabolism	Carbohydrate degradation	α-1,3-glucanase (GH71)		S17d_xPool_down
17922	Carbohydrate metabolism	Carbohydrate degradation	Α-glucosidase (GH63)	Secreted	S17d_xPool_down
6366	Carbohydrate metabolism		3-beta-glucosyltransferase		S17d_xPool_down
26401	Carbohydrate metabolism		3-beta-glucosyltransferase		S17d_xPool_down
13201	Carbohydrate metabolism	Carbohydrate biosynthesis	Glycogenin		S17d_xPool_up	S96_xPool_up
17650	Carbohydrate metabolism	Carbohydrate degradation	Cellulase (glycosyl hydrolase family 5)	Secreted	S17d_xPool_up
17583	Carbohydrate metabolism	Carbohydrate degradation	endo-β-1,3-1,4-glucanase (GH26)	Secreted	S17d_xPool_up
16262	Carbohydrate metabolism	Carbohydrate degradation	xylanase/arabinase (GH43)		S17d_xPool_up
13283	Carbohydrate metabolism	Carbohydrate degradation	β-glucuronyl hydrolase		S17d_xPool_up
13285	Carbohydrate metabolism	Carbohydrate degradation	β-glucuronyl hydrolase		S17d_xPool_up
5456	Carbohydrate metabolism	Glycolysis	Hexokinase	Secreted	S17d_xPool_up
621	Carbohydrate metabolism	Glycolysis	Phosphoglucomutase		S17d_xPool_up
12998	Carbohydrate metabolism	Pentose Phosphate pathway	Transaldolase		S17d_xPool_up	S24_xPool_up	S96_xPool_up
25918	Carbohydrate metabolism		glycosyl transferase		S17d_xPool_up
23131	Carbohydrate metabolism		Trehalose-phosphatase		S17d_xPool_up
23132	Carbohydrate metabolism		Trehalose-phosphatase		S17d_xPool_up	S96_xPool_up
23656	Carbohydrate metabolism		Trehalose-phosphatase	Secreted	S17d_xPool_up
715	Carbohydrate metabolism	Carbohydrate degradation	Cellulase (glycosyl hydrolase family 5)		S24_xPool_up
889	Carbohydrate metabolism	Carbohydrate degradation	Cellulase (glycosyl hydrolase family 5)		S24_xPool_up	S96_xPool_up
18936	Carbohydrate metabolism	Carbohydrate degradation	endoglucanase (GH12)	Secreted	S24_xPool_up
29467	Carbohydrate metabolism	Carbohydrate degradation	xylanase/arabinase (GH43)		S24_xPool_up
27821	Carbohydrate metabolism	Fructose/Mannose/Galactose	D-arabinitol 2-dehydrogenase		S24_xPool_up
13837	Carbohydrate metabolism	Fructose/Mannose/Galactose	GDP-L-fucose synthase		S24_xPool_up
8463	Carbohydrate metabolism		Beta-glucan synthesis-associated protein (SKN1)		S96_xPool_down
9414	Carbohydrate metabolism	Carbohydrate degradation	Glycosyl hydrolases family 31	Secreted	S96_xPool_up
2569	Carbohydrate metabolism	Carbohydrate degradation	α-1,3-glucanase (GH71)		S96_xPool_up
26409	Carbohydrate metabolism		3-beta-glucosyltransferase		S96_xPool_up
21048	Carbon metabolism	Alternative carbon source	Phenol 2-monooxygenase		R12_xPool_up
18992	Carbon metabolism	Alternative carbon source	Phenol 2-monooxygenase		RxS_12_down	RxS_24_down	S12_xPool_down	S24_xPool_down	S96_xPool_down
21046	Carbon metabolism	Alternative carbon source	Phenol 2-monooxygenase		S17d_xPool_up
24106	Cell adhesion		Fasciclin domain	Secreted	RxS_24_down	RxS_96_down
24107	Cell adhesion		Fasciclin domain	Secreted	RxS_96_up	S96_xPool_up
24874	Cell adhesion		Heparinase II/III-like protein	Secreted	RxS_96_up
13574	Cell adhesion		Heparinase II/III-like protein		S12_xPool_up
13391	Cell cycle	Meiosis	Shugosin		R12_xPool_down	RxS_24_down	S24_xPool_down
8322	Cell cycle	Mitosis	Anaphase-promoting complex subunit 4 WD40 domain		R12_xPool_down	S24_xPool_down
9763	Cell cycle	Mitosis	Mob1/phocein family		R12_xPool_down	R24_xPool_down	R96_xPool_down	S12_xPool_down	S24_xPool_down
20528	Cell cycle	polyamine synthesis (required for cell division)	Ornithine decarboxylase		R12_xPool_down
6528	Cell cycle		Cyclin		R12_xPool_down	R96_xPool_down	S96_xPool_down
6529	Cell cycle		Cyclin		R12_xPool_down	RxS_12_up
14227	Cell cycle		Cyclin		R12_xPool_down	S12_xPool_down
18830	Cell cycle		Cyclin		R12_xPool_down	RxS_12_up
7738	Cell cycle	Mitosis	Mitotic spindle checkpoint component MAD2		R12_xPool_up	S12_xPool_up	S24_xPool_up
574	Cell cycle		Cyclin		R12_xPool_up	R17d_xPool_up	R24_xPool_up	RxS_12_down	RxS_17d_down	RxS_24_down
13600	Cell cycle		Meiotically up-regulated gene 89 protein		R12_xPool_up	R24_xPool_up	S12_xPool_up
480	Cell cycle	Mitosis	Anaphase-promoting complex subunit 4 WD40 domain		R24_xPool_down	RxS_24_up
15431	Cell cycle	Mitosis	Condensin complex subunit 3		R24_xPool_down	RxS_12_down	S12_xPool_down	S24_xPool_down
2077	Cell cycle	Mitosis	Sister chromatid cohesion protein		R24_xPool_down	RxS_12_down	RxS_96_down	S12_xPool_down	S96_xPool_down
23304	Cell cycle	Mitosis	Structural maintenance of chromosomes protein		R24_xPool_down	RxS_96_up
15432	Cell cycle	Mitosis	Condensin complex subunit 3		R24_xPool_up	S12_xPool_up	S17d_xPool_up	S24_xPool_up
14337	Cell cycle	Mitosis	Spc24 subunit of Ndc80		R24_xPool_up	RxS_24_down
19115	Cell cycle	Mitosis	MO25-like protein		R96_xPool_down
19925	Cell cycle	Mitosis	Mitotic spindle checkpoint component mad3		R96_xPool_up	RxS_12_up	S12_xPool_up
7740	Cell cycle	Mitosis	mitotic spindle assembly checkpoint protein MAD2		RxS_12_down
13602	Cell cycle		Meiotically up-regulated gene 89 protein		RxS_12_down
20908	Cell cycle	Mitosis	mitotic spindle assembly checkpoint protein MAD2		RxS_12_up
19127	Cell cycle	Mitosis	Nuclear distribution protein nudE homolog		RxS_12_up	S12_xPool_up
2075	Cell cycle	Mitosis	Sister chromatid cohesion protein		RxS_12_up
18831	Cell cycle		Cyclin		RxS_12_up	S12_xPool_up
21121	Cell cycle		DNA replication and checkpoint protein		RxS_12_up
7953	Cell cycle		SIT4 phosphatase-associated protein		RxS_12_up
4197	Cell cycle	Mitosis	Anaphase-promoting complex subunit 4 WD40 domain		RxS_24_down
9222	Cell cycle	Mitosis	Anaphase-promoting complex subunit 4 WD40 domain		RxS_24_down
17803	Cell cycle	Microtubules	DASH complex subunit Dad2		RxS_24_up
6531	Cell cycle		Cyclin		RxS_24_up
21120	Cell cycle		DNA replication and checkpoint protein		RxS_24_up
13599	Cell cycle		Meiotically up-regulated gene 89 protein		RxS_96_down	S96_xPool_down
22622	Cell cycle	Microtubules	DASH complex subunit Ask1		RxS_96_up
3632	Cell cycle	Mitosis	Anaphase-promoting complex subunit 4 WD40 domain		RxS_96_up
13598	Cell cycle		Meiotically up-regulated gene 89 protein		RxS_96_up
18170	Cell cycle	Mitosis	Microtubule associated protein (MAP65/ASE1 family)		S12_xPool_down
2076	Cell cycle	Mitosis	Sister chromatid cohesion protein		S12_xPool_down
15704	Cell cycle		Rad9		S12_xPool_down
22050	Cell cycle	Mitosis	Cohesin subunit psc3		S17d_xPool_up
6134	Cell cycle	Mitosis	Septation protein		S17d_xPool_up
2078	Cell cycle	Mitosis	Sister chromatid cohesion protein		S17d_xPool_up
8156	Cell cycle	Mitosis	Structural maintenance of chromosomes protein		S24_xPool_down
10601	Cell cycle	Mitosis	Spo12 family		S96_xPool_up
6084	Cell wall metabolism		Cell wall alpha-1,3-glucan synthase		R12_xPool_down	R24_xPool_down	S24_xPool_down
20676	Cell wall metabolism		Probable glucan endo-1,3-beta-glucosidase		R12_xPool_up	R24_xPool_up	RxS_24_down	S12_xPool_up
9281	Cell wall metabolism		Chitin synthase		R24_xPool_down	RxS_96_down	S12_xPool_down	S17d_xPool_down	S24_xPool_down	S96_xPool_down
6156	Cell wall metabolism	cell wall melanin	Tyrosinase	Secreted	R24_xPool_up
23834	Cell wall metabolism		Chitin deacetylase	Secreted	R24_xPool_up	R96_xPool_up	S17d_xPool_up	S24_xPool_up	S96_xPool_up
3994	Cell wall metabolism		Chitinase		R24_xPool_up	S24_xPool_up
7580	Cell wall metabolism		Chitinase		R24_xPool_up	S24_xPool_up
13252	Cell wall metabolism		Pectinesterase	Secreted	R24_xPool_up	S17d_xPool_up	S24_xPool_up
24753	Cell wall metabolism		Chitin synthase		R96_xPool_up	RxS_96_down	S12_xPool_up
24758	Cell wall metabolism		Chitin synthase		R96_xPool_up	RxS_96_down
14319	Cell wall metabolism		Chitin deacetylase		RxS_12_down
8937	Cell wall metabolism		Chitin synatase		RxS_12_down	S12_xPool_down
7616	Cell wall metabolism		Chitin deacetylase		RxS_24_down
7869	Cell wall metabolism		Chitin deacetylase		RxS_24_down	S24_xPool_down	S96_xPool_down
7539	Cell wall metabolism		Probable glucan 1,3-beta-glucosidase		RxS_24_down
1895	Cell wall metabolism		1,3-beta-glucan synthase		RxS_96_down
24755	Cell wall metabolism		Chitin synthase		RxS_96_down	S17d_xPool_down	S96_xPool_down
6742	Cell wall metabolism		Probable glucan 1,3-beta-glucosidase		RxS_96_down
1704	Cell wall metabolism	cell wall melanin	Tyrosinase	Secreted	S17d_xPool_down
6082	Cell wall metabolism		Cell wall alpha-1,3-glucan synthase		S17d_xPool_down
6089	Cell wall metabolism		Cell wall alpha-1,3-glucan synthase		S17d_xPool_down
7868	Cell wall metabolism		Chitin deacetylase		S17d_xPool_down
15412	Cell wall metabolism	cell wall melanin	Tyrosinase		S17d_xPool_up	S96_xPool_up
29024	Cell wall metabolism		Chitinase	Secreted	S17d_xPool_up
29025	Cell wall metabolism		Chitinase		S17d_xPool_up
29026	Cell wall metabolism		Chitinase		S17d_xPool_up
3257	Cell wall metabolism		Polysaccharide deacetylase	Secreted	S17d_xPool_up	S24_xPool_up	S96_xPool_up
3881	Cell wall metabolism		Putative mannan endo-1,4-beta-mannosidase		S17d_xPool_up
3882	Cell wall metabolism		Putative mannan endo-1,4-beta-mannosidase		S17d_xPool_up
6155	Cell wall metabolism	cell wall melanin	Tyrosinase	Secreted	S24_xPool_up
3256	Cell wall metabolism		Chitin deacetylase	Secreted	S24_xPool_up
7537	Cell wall metabolism		Probable glucan 1,3-beta-glucosidase		S96_xPool_down
6087	Cell wall metabolism		Cell wall alpha-1,3-glucan synthase		S96_xPool_up
18506	Cytoskeleton and vesicle trafficking	Microtubules	ATP-binding dynein motor region D5		R12_xPool_down	R24_xPool_down	S17d_xPool_down	S24_xPool_down	S96_xPool_down
9640	Cytoskeleton and vesicle trafficking	Microtubules	CLASP protein		R12_xPool_down
15688	Cytoskeleton and vesicle trafficking	Microtubules	Kinesin protein		R12_xPool_down	RxS_96_up	S17d_xPool_down
22982	Cytoskeleton and vesicle trafficking	Microtubules	Myosin		R12_xPool_down	S12_xPool_down	S96_xPool_down
22983	Cytoskeleton and vesicle trafficking	Microtubules	Myosin		R12_xPool_down	S12_xPool_down	S24_xPool_down
19664	Cytoskeleton and vesicle trafficking		actin cytoskeleton-regulatory complex END3		R12_xPool_down	R24_xPool_down	RxS_12_up
20709	Cytoskeleton and vesicle trafficking		Alpha-actinin-like protein		R12_xPool_down	RxS_12_up
19427	Cytoskeleton and vesicle trafficking		Coatomer (COPI) alpha subunit C-terminus		R12_xPool_down	R24_xPool_down	RxS_24_up	S12_xPool_down	S96_xPool_down
3614	Cytoskeleton and vesicle trafficking	Microtubules	Kinesin protein		R12_xPool_up
22981	Cytoskeleton and vesicle trafficking	Microtubules	Myosin		R12_xPool_up	R17d_xPool_up	S12_xPool_up	S17d_xPool_up
10845	Cytoskeleton and vesicle trafficking	Vesicle transport	Protein dopey		R12_xPool_up	RxS_12_down	RxS_24_up	S24_xPool_up
18256	Cytoskeleton and vesicle trafficking		Coffilin		R12_xPool_up	S17d_xPool_up	S24_xPool_up	S96_xPool_up
996	Cytoskeleton and vesicle trafficking		Fes/CIP4, and EFC/F-BAR homology domain		R12_xPool_up
9067	Cytoskeleton and vesicle trafficking		Mitochondria fission 1 protein		R12_xPool_up	S12_xPool_up	S17d_xPool_up
13814	Cytoskeleton and vesicle trafficking		Septin		R12_xPool_up	S12_xPool_up	S24_xPool_up
11141	Cytoskeleton and vesicle trafficking		Sorting nexin MVP1		R12_xPool_up	S12_xPool_up	S17d_xPool_up
2913	Cytoskeleton and vesicle trafficking	Cell morphology	Pal1 cell morphology protein		R17d_xPool_up	R96_xPool_up	RxS_12_up	RxS_24_up	S12_xPool_up	S24_xPool_up	S96_xPool_up
3612	Cytoskeleton and vesicle trafficking	Microtubules	Kinesin protein		R17d_xPool_up	S24_xPool_up	S96_xPool_up
1263	Cytoskeleton and vesicle trafficking		Actin cytoskeleton-regulatory complex protein		R17d_xPool_up	RxS_12_up	S12_xPool_up	S17d_xPool_up
11615	Cytoskeleton and vesicle trafficking	Cytoskeleton	Actin		R24_xPool_down	S12_xPool_down	S24_xPool_down
10333	Cytoskeleton and vesicle trafficking	Microtubules	Kinesin protein		R24_xPool_down
7627	Cytoskeleton and vesicle trafficking		Actin cytoskeleton-regulatory complex protein		R24_xPool_down	S17d_xPool_down	S96_xPool_down
13111	Cytoskeleton and vesicle trafficking		CAP-Gly domain		R24_xPool_down	S12_xPool_down
994	Cytoskeleton and vesicle trafficking		Fes/CIP4, and EFC/F-BAR homology domain		R24_xPool_down
7903	Cytoskeleton and vesicle trafficking		Golgi-body localisation protein domain		R24_xPool_down	S96_xPool_down
25034	Cytoskeleton and vesicle trafficking		SecY translocase		R24_xPool_down
21927	Cytoskeleton and vesicle trafficking	Exocytosys	Syntaxin		R24_xPool_up	RxS_24_down
8546	Cytoskeleton and vesicle trafficking	Vesicle transport	Adaptin		R24_xPool_up	RxS_24_down
8547	Cytoskeleton and vesicle trafficking	Vesicle transport	Adaptin		R24_xPool_up	R96_xPool_up	S12_xPool_up	S17d_xPool_up	S96_xPool_up
23116	Cytoskeleton and vesicle trafficking	Vesicle transport	Clathrin adaptor		R24_xPool_up	S12_xPool_up
12775	Cytoskeleton and vesicle trafficking		Dynactin		R24_xPool_up
8676	Cytoskeleton and vesicle trafficking		Pep3/Vps18/deep orange family		R24_xPool_up
6495	Cytoskeleton and vesicle trafficking		secretory pathway GDP dissociation inhibitor 1		R24_xPool_up	R96_xPool_up	S24_xPool_up	S96_xPool_up
17025	Cytoskeleton and vesicle trafficking		Vacuolar sorting protein		R24_xPool_up	S24_xPool_up
22064	Cytoskeleton and vesicle trafficking		Guanine nucleotide exchange factor in Golgi transport N-terminal		R96_xPool_down
2914	Cytoskeleton and vesicle trafficking	Cell morphology	Pal1 cell morphology protein		RxS_12_down
5513	Cytoskeleton and vesicle trafficking	Cytoskeleton	Actin		RxS_12_down
26646	Cytoskeleton and vesicle trafficking	Cytoskeleton	Actin		RxS_12_down
16532	Cytoskeleton and vesicle trafficking	endoplasmic reticulum organization	SEY1-homolog		RxS_12_down
16534	Cytoskeleton and vesicle trafficking	endoplasmic reticulum organization	SEY1-homolog		RxS_12_down	S17d_xPool_down
14487	Cytoskeleton and vesicle trafficking	Exocytosys	Probable exocyst complex component sec8		RxS_12_down	S12_xPool_down
16536	Cytoskeleton and vesicle trafficking		Peroxin 13, N-terminal region		RxS_12_down
25832	Cytoskeleton and vesicle trafficking		Peroxisomal targeting signal 1 receptor		RxS_12_down
12571	Cytoskeleton and vesicle trafficking		Protein transport protein Sec24C		RxS_12_down	RxS_24_up
9992	Cytoskeleton and vesicle trafficking		Vacuolar protein sorting-associated protein		RxS_12_down	RxS_24_down
18078	Cytoskeleton and vesicle trafficking		Vacuolar protein sorting-associated protein		RxS_12_down	S12_xPool_down
26647	Cytoskeleton and vesicle trafficking	Cytoskeleton	Actin		RxS_12_up
16529	Cytoskeleton and vesicle trafficking	endoplasmic reticulum organization	SEY1-homolog		RxS_12_up
16533	Cytoskeleton and vesicle trafficking	endoplasmic reticulum organization	SEY1-homolog		RxS_12_up	RxS_24_up
15987	Cytoskeleton and vesicle trafficking	Microtubules	MIT (microtubule interacting and transport) domain		RxS_12_up
11753	Cytoskeleton and vesicle trafficking	Microtubules	Myosin		RxS_12_up
7628	Cytoskeleton and vesicle trafficking		Actin cytoskeleton-regulatory complex protein		RxS_12_up	RxS_24_up	RxS_96_down
7663	Cytoskeleton and vesicle trafficking		ADP-ribosylation factor		RxS_12_up	S12_xPool_up
25492	Cytoskeleton and vesicle trafficking		ADP-ribosylation factor		RxS_12_up	RxS_96_down
22451	Cytoskeleton and vesicle trafficking		Dynamin family		RxS_12_up
26254	Cytoskeleton and vesicle trafficking		HOOK protein	Secreted	RxS_12_up
25831	Cytoskeleton and vesicle trafficking		Peroxisomal targeting signal 1 receptor		RxS_12_up
20966	Cytoskeleton and vesicle trafficking		Secretory pathway protein Sec39		RxS_12_up
7722	Cytoskeleton and vesicle trafficking		SNARE associated Golgi protein		RxS_12_up	S17d_xPool_down
15179	Cytoskeleton and vesicle trafficking		Vacuolar protein sorting-associated protein		RxS_12_up
25087	Cytoskeleton and vesicle trafficking	Cytoskeleton	Actin		RxS_24_down
12747	Cytoskeleton and vesicle trafficking	endocytosis	Eisosome component PIL1		RxS_24_down
12765	Cytoskeleton and vesicle trafficking		ARF guanine-nucleotide exchange factor		RxS_24_down
25486	Cytoskeleton and vesicle trafficking		ADP-ribosylation factor		RxS_24_down	S24_xPool_down
19426	Cytoskeleton and vesicle trafficking		Coatomer (COPI) alpha subunit C-terminus		RxS_24_down	RxS_96_up
9998	Cytoskeleton and vesicle trafficking		Dor1-like family		RxS_24_down
12746	Cytoskeleton and vesicle trafficking	endocytosis	Eisosome component PIL1		RxS_24_up
3616	Cytoskeleton and vesicle trafficking	Microtubules	Kinesin protein		RxS_24_up
22122	Cytoskeleton and vesicle trafficking	Microtubules	Kinesin protein		RxS_24_up	S24_xPool_up
10849	Cytoskeleton and vesicle trafficking	Vesicle transport	Protein dopey		RxS_24_up
25484	Cytoskeleton and vesicle trafficking		ADP-ribosylation factor		RxS_24_up	RxS_96_down
10433	Cytoskeleton and vesicle trafficking		Trafficking protein Mon1		RxS_24_up
16531	Cytoskeleton and vesicle trafficking	endoplasmic reticulum organization	SEY1-homolog		RxS_96_up
3617	Cytoskeleton and vesicle trafficking	Microtubules	Kinesin protein		RxS_96_up
26918	Cytoskeleton and vesicle trafficking	Microtubules	Kinesin protein		RxS_96_up
8659	Cytoskeleton and vesicle trafficking	Vesicle transport	Adaptin		RxS_96_up
8660	Cytoskeleton and vesicle trafficking	Vesicle transport	Adaptin		RxS_96_up
7302	Cytoskeleton and vesicle trafficking		Autophagy protein Apg9		RxS_96_up
24206	Cytoskeleton and vesicle trafficking		Cytoplasmic dynein 1 light intermediate chain		RxS_96_up	S24_xPool_down
10022	Cytoskeleton and vesicle trafficking		Dynactin		RxS_96_up
18650	Cytoskeleton and vesicle trafficking		Sec1 family		RxS_96_up
14846	Cytoskeleton and vesicle trafficking		Transport protein particle subunit trs31		RxS_96_up
4082	Cytoskeleton and vesicle trafficking		Vacuolar protein sorting-associated protein		RxS_96_up
14582	Cytoskeleton and vesicle trafficking	Microtubules	GTP-binding protein rhoA		S12_xPool_down
22120	Cytoskeleton and vesicle trafficking	Microtubules	Kinesin protein		S12_xPool_down	S24_xPool_down
18511	Cytoskeleton and vesicle trafficking		Dynein heavy chain		S12_xPool_down
995	Cytoskeleton and vesicle trafficking		Fes/CIP4, and EFC/F-BAR homology domain		S12_xPool_down
10480	Cytoskeleton and vesicle trafficking		Peroxisomal targeting signal 1 receptor		S12_xPool_down	S17d_xPool_down
11576	Cytoskeleton and vesicle trafficking		Protein transport protein sec71		S12_xPool_down	S24_xPool_down
16464	Cytoskeleton and vesicle trafficking		Vacuolar protein sorting-associated protein		S12_xPool_down	S96_xPool_down
14488	Cytoskeleton and vesicle trafficking	Exocytosys	Probable exocyst complex component sec8		S12_xPool_up	S17d_xPool_up	S24_xPool_up
12490	Cytoskeleton and vesicle trafficking		Autophagy-related protein 11		S12_xPool_up	S24_xPool_up
23452	Cytoskeleton and vesicle trafficking		Septin		S12_xPool_up
20166	Cytoskeleton and vesicle trafficking		Translocation protein sec63		S12_xPool_up
7625	Cytoskeleton and vesicle trafficking		Actin cytoskeleton-regulatory complex protein		S17d_xPool_down
25495	Cytoskeleton and vesicle trafficking		ADP-ribosylation factor		S17d_xPool_down
12488	Cytoskeleton and vesicle trafficking		Autophagy-related protein 11		S17d_xPool_down
26895	Cytoskeleton and vesicle trafficking		Autophagy-related protein C terminal domain		S17d_xPool_down
16429	Cytoskeleton and vesicle trafficking		Dynactin		S17d_xPool_down
14077	Cytoskeleton and vesicle trafficking		SNARE associated Golgi protein		S17d_xPool_down
21179	Cytoskeleton and vesicle trafficking	Microtubules	CLASP protein		S17d_xPool_up
14057	Cytoskeleton and vesicle trafficking	Microtubules	Myosin		S17d_xPool_up
11575	Cytoskeleton and vesicle trafficking		Protein transport protein sec71		S17d_xPool_up
8297	Cytoskeleton and vesicle trafficking		Synaptobrevin		S17d_xPool_up
16256	Cytoskeleton and vesicle trafficking		Tubulin-specific chaperone		S17d_xPool_up
15905	Cytoskeleton and vesicle trafficking		Protein transport protein sec71		S24_xPool_down
17026	Cytoskeleton and vesicle trafficking		Vacuolar protein sorting-associated protein		S24_xPool_down
19425	Cytoskeleton and vesicle trafficking		Coatomer (COPI) alpha subunit C-terminus		S24_xPool_up
21914	Cytoskeleton and vesicle trafficking		Vacuolar protein sorting-associated protein		S24_xPool_up
14581	Cytoskeleton and vesicle trafficking	Microtubules	GTP-binding protein rhoA		S96_xPool_down
5191	Cytoskeleton and vesicle trafficking	Microtubules	Kinesin protein		S96_xPool_down
20975	Cytoskeleton and vesicle trafficking	Vesicle transport	Alpha and gamma adaptin binding protein p34		S96_xPool_down
18651	Cytoskeleton and vesicle trafficking		Sec1 family		S96_xPool_down
4477	Cytoskeleton and vesicle trafficking		Vacuolar protein sorting-associated protein		S96_xPool_down
16249	Cytoskeleton and vesicle trafficking	Microtubules	Formin		S96_xPool_up
28646	Development	Histones and associated proteins	Histone-binding protein RBBP4 or subunit C of CAF1 complex		RxS_12_up
15368	Development	Sporulation	SUR7/PalI family		RxS_12_up	S12_xPool_up
19528	Development		Cell morphogenesis protein		RxS_24_up
4447	Development		Component of IIS longevity pathway SMK-1		S17d_xPool_down
26666	Development		Target of rapamycin complex 2 subuni		S24_xPool_up
14546	DNA metabolism	Histones and associated proteins	Chromatin remodeling factor mit1		R12_xPool_down	S12_xPool_down	S17d_xPool_down	S24_xPool_down
9503	DNA metabolism	Histones and associated proteins	Histone-lysine N-methyltransferase	Secreted	R12_xPool_down	S96_xPool_down
9631	DNA metabolism	Histones and associated proteins	Histone-lysine N-methyltransferase		R12_xPool_down	S12_xPool_down
24548	DNA metabolism	Repair	DNA mismatch repair protein Mlh1		R12_xPool_down	R17d_xPool_down	RxS_96_down	S12_xPool_down	S96_xPool_down
14314	DNA metabolism	Repair	Ku70/Ku80		R12_xPool_down
11595	DNA metabolism		Topoisomerase 2		R12_xPool_down	R24_xPool_down	S12_xPool_down	S17d_xPool_down
13552	DNA metabolism	Chromatin structure	Core histone H2A/H2B/H3/H4		R12_xPool_up
28673	DNA metabolism	Chromatin structure	Core histone H2A/H2B/H3/H4		R12_xPool_up	R24_xPool_up
28816	DNA metabolism	Chromatin structure	Core histone H2A/H2B/H3/H4		R12_xPool_up	R24_xPool_up	RxS_12_down	S24_xPool_up
27802	DNA metabolism	Histones and associated proteins	FACT complex subunit SPT16		R12_xPool_up	S12_xPool_up	S17d_xPool_up
13553	DNA metabolism	Histones and associated proteins	Histone H4		R12_xPool_up	S24_xPool_up
25757	DNA metabolism	Histones and associated proteins	Histone H4		R12_xPool_up	S24_xPool_up
28817	DNA metabolism	Histones and associated proteins	Histone H4		R12_xPool_up	S24_xPool_up
18011	DNA metabolism	pyrimidine metabolism	Aspartate/ornithine carbamoyltransferase		R12_xPool_up	R24_xPool_up	S12_xPool_up	S17d_xPool_up	S24_xPool_up
7482	DNA metabolism	replication	DNA replication licensing factor mcm4		R12_xPool_up	R24_xPool_up	RxS_24_down	S12_xPool_up
11592	DNA metabolism		Topoisomerase 2		R24_xPool_down	RxS_24_up
13551	DNA metabolism	Chromatin structure	Core histone H2A/H2B/H3/H4		R24_xPool_up	S24_xPool_up
25758	DNA metabolism	Chromatin structure	Core histone H2A/H2B/H3/H4		R24_xPool_up	S12_xPool_up	S96_xPool_up
22607	DNA metabolism		helicase		R24_xPool_up	S24_xPool_up
14544	DNA metabolism	Histones and associated proteins	Chromatin remodeling factor mit1		R96_xPool_down
24549	DNA metabolism	Repair	DNA mismatch repair protein Mlh1		R96_xPool_down	RxS_12_down	S24_xPool_down
21947	DNA metabolism	Histones and associated proteins	Centromere kinetochore component CENP-T histone fold		RxS_12_down
7701	DNA metabolism	Telomer maintance	Telomeric single stranded DNA binding POT1/CDC13		RxS_12_down	S12_xPool_down
28861	DNA metabolism		Predicted restriction endonuclease		RxS_12_down
14547	DNA metabolism	Histones and associated proteins	Chromatin remodeling factor mit1		RxS_12_up
10176	DNA metabolism	Purine metabolism	Adenylosuccinate synthetase		RxS_12_up	S17d_xPool_down
24547	DNA metabolism	Repair	DNA mismatch repair protein Mlh1		RxS_12_up
19857	DNA metabolism	repair	DNA repair protein rad13		RxS_12_up
27952	DNA metabolism	Repair	DNA repair protein RAD16		RxS_12_up	S24_xPool_down
4525	DNA metabolism	Repair	MutS		RxS_12_up
9175	DNA metabolism	replication	Origin recognition complex (ORC) subunit 4 C-terminus		RxS_12_up	RxS_96_down
24007	DNA metabolism	replication	Proliferating cell nuclear antigen		RxS_12_up	S12_xPool_up
17619	DNA metabolism	replication	Replication factor C subunit		RxS_12_up
25732	DNA metabolism		SNF2 family N-terminal domain		RxS_12_up	S12_xPool_up
28668	DNA metabolism	Telomer maintance	Telomerase reverse transcriptase		RxS_17d_down
8919	DNA metabolism	Histones and associated proteins	Bromodomain-containing factor		RxS_24_down
8921	DNA metabolism	Histones and associated proteins	Bromodomain-containing factor		RxS_24_down
2717	DNA metabolism	Histones and associated proteins	Probable histone demethylase		RxS_24_down	S24_xPool_down	S96_xPool_down
13753	DNA metabolism	Recombination	Recombining binding protein suppressor of hairless-like protein		RxS_24_down
14234	DNA metabolism	Repair	DNA repair and recombination protein RAD54B		RxS_24_down
12199	DNA metabolism	Repair	Ku70/Ku80		RxS_24_down
12144	DNA metabolism		DNA polymerase alpha/epsilon subunit B		RxS_24_down
21946	DNA metabolism	Histones and associated proteins	Centromere kinetochore component CENP-T histone fold		RxS_24_up	RxS_96_down
8796	DNA metabolism	Histones and associated proteins	Histone H2A		RxS_24_up	S12_xPool_up	S17d_xPool_up	S24_xPool_up	S96_xPool_up
18115	DNA metabolism	Repair	DNA photolyase		RxS_24_up
14093	DNA metabolism	Histones and associated proteins	Bromodomain-containing factor		RxS_96_down
18013	DNA metabolism	pyrimidine metabolism	Aspartate/ornithine carbamoyltransferase		RxS_96_down
8484	DNA metabolism	Repair	MutS		RxS_96_down
1387	DNA metabolism	DNA methylation	C-5 cytosine-specific DNA methylase		RxS_96_up	S12_xPool_down	S17d_xPool_down
11437	DNA metabolism	Histones and associated proteins	Bromodomain-containing factor		RxS_96_up	S12_xPool_down
17805	DNA metabolism	Histones and associated proteins	Bromodomain-containing factor		RxS_96_up
28203	DNA metabolism	Histones and associated proteins	Protein N-methyltransferase nnt1		RxS_96_up
3629	DNA metabolism	Histones and associated proteins	WSTF, HB1, Itc1p, MBD9 motif 1		RxS_96_up
17617	DNA metabolism	replication	Replication factor C subunit		RxS_96_up
22085	DNA metabolism		Topoisomerase 1		RxS_96_up	S96_xPool_up
27800	DNA metabolism	Histones and associated proteins	FACT complex subunit SPT16		S12_xPool_down
11407	DNA metabolism	repair	BRCA1		S12_xPool_down
4782	DNA metabolism	Repair	DNA repair helicase rad15		S12_xPool_down	S17d_xPool_down	S24_xPool_down
14542	DNA metabolism	Histones and associated proteins	Chromatin remodeling factor mit1		S12_xPool_up
9629	DNA metabolism	Histones and associated proteins	Histone-lysine N-methyltransferase		S12_xPool_up
28201	DNA metabolism	Histones and associated proteins	Protein N-methyltransferase nnt1		S12_xPool_up	S96_xPool_up
13757	DNA metabolism	Recombination	Recombining binding protein suppressor of hairless-like protein		S12_xPool_up
6303	DNA metabolism	Repair	DNA glycosilase		S12_xPool_up
4366	DNA metabolism	Histones and associated proteins	transcriptional adapter 2		S17d_xPool_down
3358	DNA metabolism	Repair	DNA-(apurinic or apyrimidinic site) lyase 2		S17d_xPool_down
28645	DNA metabolism		DNA helicase		S17d_xPool_down
16784	DNA metabolism	Histones and associated proteins	JmjC domain-containing protein (histone modification)		S17d_xPool_up
25283	DNA metabolism	Purine metabolism	AMP deaminase		S17d_xPool_up
17868	DNA metabolism	replication	DNA polymerase epsilon catalytic subunit		S17d_xPool_up	S24_xPool_up
17869	DNA metabolism	replication	DNA polymerase epsilon catalytic subunit		S24_xPool_up
17621	DNA metabolism	replication	Replication factor C subunit		S24_xPool_up
9965	DNA metabolism		RuvB-like helicase 2		S24_xPool_up
4828	DNA metabolism	Histones and associated proteins	Histone-lysine N-methyltransferase		S96_xPool_up
2718	DNA metabolism	Histones and associated proteins	Probable histone demethylase		S96_xPool_up
13756	DNA metabolism	Recombination	Recombining binding protein suppressor of hairless-like protein		S96_xPool_up
10327	DNA metabolism		DNA repair/transcription protein		S96_xPool_up
8519	DNA metabolism		DNA topoisomerase		S96_xPool_up
26518	Lipid metabolism		Choline/ethanolamine kinase		R12_xPool_down	S96_xPool_down
17855	Lipid metabolism	Beta-oxidation	Acyl-CoA dehydrogenase		R12_xPool_up	RxS_12_down
12674	Lipid metabolism	Fatty acid biosynthesis	Acetyl-CoA carboxylase, central region		R12_xPool_up	R24_xPool_up	S24_xPool_up
24476	Lipid metabolism	isoprenoid	Hydroxymethylglutaryl-coenzyme A synthase		R12_xPool_up	S12_xPool_up
23158	Lipid metabolism		3-ketodihydrosphingosine reductase		R12_xPool_up	S12_xPool_up
7150	Lipid metabolism		3-oxoacyl-[acyl-carrier-protein] reductase		R12_xPool_up	R24_xPool_up	RxS_12_down
15546	Lipid metabolism		Glycerol-3-phosphate dehydrogenase		R12_xPool_up	S17d_xPool_up	S24_xPool_up
9817	Lipid metabolism		Lipase		R12_xPool_up	R24_xPool_up	S12_xPool_up	S24_xPool_up
28638	Lipid metabolism		Lipase		R12_xPool_up	S12_xPool_up
18275	Lipid metabolism		Long chain acyl-CoA synthetase		R12_xPool_up	RxS_12_down
15025	Lipid metabolism	Beta-oxidation	Acyl-CoA dehydrogenase		R24_xPool_down	S24_xPool_down
8041	Lipid metabolism		Acyltransferase		R24_xPool_down	RxS_24_up
8013	Lipid metabolism		Fatty acid desaturase		R24_xPool_down	S12_xPool_down	S96_xPool_down
24460	Lipid metabolism		Lipase		R24_xPool_down
19839	Lipid metabolism	isoprenoid	Hydroxymethylglutaryl-coenzyme A synthase		R24_xPool_up	RxS_24_down
24475	Lipid metabolism	isoprenoid	Hydroxymethylglutaryl-coenzyme A synthase		R24_xPool_up	S17d_xPool_up
9437	Lipid metabolism		Fatty acid synthase subunit beta		R96_xPool_down
10582	Lipid metabolism		Probable 1-acyl-sn-glycerol-3-phosphate acyltransferase		R96_xPool_up	RxS_96_down
10584	Lipid metabolism		Probable 1-acyl-sn-glycerol-3-phosphate acyltransferase		R96_xPool_up	RxS_12_up	RxS_24_up	S12_xPool_up	S24_xPool_up	S96_xPool_up
12606	Lipid metabolism		START domain		R96_xPool_up	RxS_24_up	RxS_96_down	S24_xPool_up
28539	Lipid metabolism	Beta-oxidation	Acyl-CoA dehydrogenase		RxS_12_down
9061	Lipid metabolism		Calcium-independent phospholipase A2-gamma		RxS_12_down
4340	Lipid metabolism		Lanosterol synthase		RxS_12_down	S12_xPool_down	S96_xPool_down
28395	Lipid metabolism		Lysophospholipase		RxS_12_down	S17d_xPool_down
21486	Lipid metabolism		phosphatidylserine synthase		RxS_12_down
10580	Lipid metabolism		Probable 1-acyl-sn-glycerol-3-phosphate acyltransferase		RxS_12_down
17636	Lipid metabolism		START domain		RxS_12_down
12752	Lipid metabolism	glycerophospholipid	Choline-phosphate cytidylyltransferase		RxS_12_up
9063	Lipid metabolism		Calcium-independent phospholipase A2-gamma		RxS_12_up
5215	Lipid metabolism		Diacylglycerol acyltransferase		RxS_12_up	RxS_24_down
28636	Lipid metabolism		Lipase	Secreted	RxS_12_up
977	Lipid metabolism		START domain		RxS_12_up
15545	Lipid metabolism		Glycerol-3-phosphate dehydrogenase		RxS_24_down	S24_xPool_down
5718	Lipid metabolism		Long-chain-fatty-acid--CoA ligase 2		RxS_24_down	S17d_xPool_down
14979	Lipid metabolism		Mycolic acid cyclopropane synthetase		RxS_24_down
14980	Lipid metabolism		Mycolic acid cyclopropane synthetase		RxS_24_up
16978	Lipid metabolism		Phospholipid methyltransferase		RxS_24_up
10583	Lipid metabolism		Probable 1-acyl-sn-glycerol-3-phosphate acyltransferase		RxS_24_up
2466	Lipid metabolism		Rhamnolipids biosynthesis 3-oxoacyl-[acyl-carrier-protein] reductase		RxS_24_up	RxS_96_up	S24_xPool_up	S96_xPool_up
15948	Lipid metabolism		Sterol-sensing domain of SREBP cleavage-activation		RxS_24_up	S17d_xPool_down
5717	Lipid metabolism		Long-chain-fatty-acid--CoA ligase 2		RxS_96_down
2467	Lipid metabolism		Rhamnolipids biosynthesis 3-oxoacyl-[acyl-carrier-protein] reductase		RxS_96_down	S96_xPool_down
15894	Lipid metabolism	fatty acid metabolism	Malonyl CoA-acyl carrier protein transacylase		RxS_96_up	S96_xPool_up
9666	Lipid metabolism	isoprenoid	isopentenyl-diphosphate Delta-isomerase		RxS_96_up
8038	Lipid metabolism		Acyltransferase		RxS_96_up
9645	Lipid metabolism		Lysophospholipase	Secreted	RxS_96_up
8016	Lipid metabolism		Fatty acid desaturase		S12_xPool_up	S17d_xPool_up
15026	Lipid metabolism	Beta-oxidation	Acyl-CoA dehydrogenase		S17d_xPool_down
16976	Lipid metabolism		Phospholipid methyltransferase		S17d_xPool_down
361	Lipid metabolism	Membrane-related	SCP-2 sterol transfer family		S17d_xPool_up
4051	Lipid metabolism		Lipase		S17d_xPool_up
4615	Lipid metabolism		lipase		S17d_xPool_up
23227	Lipid metabolism		Mycolic acid cyclopropane synthetase		S17d_xPool_up
16612	Lipid metabolism		Sphingomyelin phosphodiesterase		S17d_xPool_up
28391	Lipid metabolism		Lysophospholipase		S24_xPool_down
978	Lipid metabolism		START domain		S24_xPool_down
9595	Lipid metabolism		vigilin		S24_xPool_down
17856	Lipid metabolism	Beta-oxidation	Acyl-CoA dehydrogenase		S24_xPool_up
11948	Lipid metabolism		Acyltransferase		S96_xPool_down
9646	Lipid metabolism		Lysophospholipase		S96_xPool_up
24158	Lipid metabolism		Putative elongation of fatty acids protein		S96_xPool_up
2468	Lipid metabolism		Rhamnolipids biosynthesis 3-oxoacyl-[acyl-carrier-protein] reductase		S96_xPool_up
3117	Cell cycle	Mitosis	Anaphase-promoting complex subunit 1		R12_xPool_down	S12_xPool_down	S24_xPool_down
2409	Cell cycle	Mitosis	Anaphase-promoting complex subunit 4 WD40 domain		RxS_12_up
4297	Cell cycle	Mitosis	Anaphase-promoting complex subunit 4 WD40 domain		S12_xPool_up	S24_xPool_up
6503	Cell cycle	Mitosis	Condensin complex subunit 2		S17d_xPool_up
11219	Nitrogen metabolism	Aminoacid	Phosphatidylserine decarboxylase		R12_xPool_down	R24_xPool_down	RxS_24_up	S12_xPool_down	S96_xPool_down
15875	Nitrogen metabolism	Aminoacid biosynthesis	Carbamoyl-phosphate synthase arginine-specific large chain		R12_xPool_down
20771	Nitrogen metabolism	Aminoacid	Adenosylhomocysteinase		R12_xPool_up	S12_xPool_up	S24_xPool_up
20772	Nitrogen metabolism	Aminoacid	Adenosylhomocysteinase		R12_xPool_up	R24_xPool_up	RxS_24_down	S12_xPool_up
5228	Nitrogen metabolism	phenylpropanoid biosynthesis	PAL		R12_xPool_up	R24_xPool_up	RxS_24_down	S12_xPool_up
15416	Nitrogen metabolism	Aminoacid	Glutamine amidotransferases class-II		R24_xPool_down	RxS_96_up
29335	Nitrogen metabolism	Aminoacid	Cysteine synthase		R24_xPool_up	S96_xPool_up
29003	Nitrogen metabolism	Aminoacid	DAHP synthetase I family		R24_xPool_up	RxS_24_down
15415	Nitrogen metabolism	Aminoacid	glutamate synthase		RxS_12_up
3387	Nitrogen metabolism	Aminoacid biosynthesis	ATP phosphoribosyltransferase (histidine biosynthesis)	Secreted	RxS_12_up	RxS_24_down
1064	Nitrogen metabolism	ureia cycle	NAD-specific glutamate dehydrogenase		RxS_12_up	S17d_xPool_down
23773	Nitrogen metabolism	Aminoacid	Asparaginase, N-terminal		RxS_24_down	S24_xPool_down
5599	Nitrogen metabolism	Aminoacid	homocitrate synthase		RxS_24_down
22604	Nitrogen metabolism	Aminoacid biosynthesis	Carbamoyl-phosphate synthase arginine-specific small chain		RxS_24_down
5227	Nitrogen metabolism	phenylpropanoid biosynthesis	PAL		RxS_96_down
3152	Nitrogen metabolism	Aminoacid	Glutamine amidotransferases class-II		S12_xPool_down
25334	Nitrogen metabolism	Aminoacid	Tryptophan synthase alpha chain		S12_xPool_down
3386	Nitrogen metabolism	Aminoacid biosynthesis	ATP phosphoribosyltransferase (histidine biosynthesis)		S12_xPool_down
29754	Nitrogen metabolism	Aminoacid	5-methyltetrahydropteroyltriglutamate--homocysteine methyltransferase		S12_xPool_up
11534	Nitrogen metabolism	aminoacid metabolism	Chorismate mutase type II		S12_xPool_up	S17d_xPool_up
5229	Nitrogen metabolism	phenylpropanoid biosynthesis	PAL		S17d_xPool_down
20431	Nitrogen metabolism	ureia cycle	Glutamate dehydrogenase		S17d_xPool_down
17068	Nitrogen metabolism	Aminoacid	Dihydroxy-acid dehydratase		S17d_xPool_up
11588	Nitrogen metabolism	Aminoacid	Protein ARG5,6		S96_xPool_up
13711	Nucleotide metabolism		Bis(5'-nucleosyl)-tetraphosphatase		R12_xPool_down	R24_xPool_down	RxS_24_up	S12_xPool_down
13723	Nucleotide metabolism		adenosine kinase		R12_xPool_up	R24_xPool_up	RxS_24_down
5292	Nucleotide metabolism	Purine metabolism	Phosphoribosylglycinamide formyltransferase		R24_xPool_up	RxS_24_down	S17d_xPool_up
11774	Nucleotide metabolism		Ribose-phosphate pyrophosphokinase		RxS_12_up
13712	Nucleotide metabolism		Bis(5'-nucleosyl)-tetraphosphatase		RxS_24_down
5293	Nucleotide metabolism	Purine metabolism	Phosphoribosylglycinamide formyltransferase		RxS_24_up
13709	Nucleotide metabolism		Bis(5'-nucleosyl)-tetraphosphatase		RxS_24_up
18940	Nucleotide metabolism	Pyrimidine metabolism	Uracil phosphoribosyltransferase		S17d_xPool_down
19128	Nucleotide metabolism	Purine metabolism	Bifunctional purine biosynthetic protein		S17d_xPool_up
27954	Nucleotide metabolism		CTP synthase		S96_xPool_down
14069	others		Ankyrin repeat protein		R12_xPool_down	RxS_12_up
1090	others		Domain of unknown function in PX-proteins (DUF3818)		R12_xPool_down	R24_xPool_down	S12_xPool_down	S17d_xPool_down	S24_xPool_down	S96_xPool_down
24847	others		Fungal Zn(2)-Cys(6) binuclear cluster domain		R12_xPool_down
25182	others		GRIP-related Arf-binding domain		R12_xPool_down
5303	others		Hydrolase (Beta-lactamase)		R12_xPool_down	RxS_12_up	S96_xPool_down
16515	others		Kelch motif		R12_xPool_down	R24_xPool_down	S12_xPool_down	S17d_xPool_down	S24_xPool_down
7203	others		lipin, N-terminal conserved region		R12_xPool_down	R24_xPool_down	R96_xPool_down	S12_xPool_down
25868	others		Methyltransferase		R12_xPool_down	R96_xPool_down	S12_xPool_down
22425	others		regulator of the ATPase of vacuolar and endosomal membranes		R12_xPool_down
10842	others		short chain dehydrogenase		R12_xPool_down
2002	others		Variant SH3 domain		R12_xPool_down	R24_xPool_down	S12_xPool_down
3301	others		CRAL/TRIO domain		R12_xPool_up	R24_xPool_up	S12_xPool_up	S17d_xPool_up	S24_xPool_up	S96_xPool_up
5778	others		CRAL/TRIO domain		R12_xPool_up
28294	others		PPR repeat family		R12_xPool_up	S12_xPool_up
1614	others		Ser-Thr-rich glycosyl-phosphatidyl-inositol-anchored membrane family	Secreted	R12_xPool_up	S12_xPool_up
17606	others		Ser-Thr-rich glycosyl-phosphatidyl-inositol-anchored membrane family	Secreted	R12_xPool_up	R17d_xPool_up	RxS_12_down	S17d_xPool_up
6445	others		Zinc finger, C2H2 type		R12_xPool_up	RxS_12_down
16165	others		Zinc-binding dehydrogenase		R12_xPool_up	RxS_24_up	S12_xPool_up	S17d_xPool_up	S24_xPool_up
9886	others		FHA domain		R17d_xPool_down	R96_xPool_down	RxS_24_down	RxS_96_up	S24_xPool_down
5304	others		Hydrolase (Beta-lactamase)		R17d_xPool_down	RxS_12_up	S24_xPool_down
19124	others		Alpha/beta hydrolase family		R24_xPool_down	RxS_24_up
882	others		Ankyrin repeat protein		R24_xPool_down
23479	others		FHA domain		R24_xPool_down	R96_xPool_down	RxS_96_up	S17d_xPool_down
6612	others		Leucine Rich repeat		R24_xPool_down	S12_xPool_down	S17d_xPool_down	S24_xPool_down
21738	others		ring finger protein		R24_xPool_down	RxS_24_up
8248	others		WD domain, G-beta repeat		R24_xPool_down	RxS_96_up
582	others		WD repeat-containing protein		R24_xPool_down	RxS_96_up	S12_xPool_down	S24_xPool_down
10840	others		short chain dehydrogenase		R24_xPool_up	R96_xPool_up	S17d_xPool_up	S24_xPool_up	S96_xPool_up
16833	others		Alpha/beta hydrolase family		R96_xPool_down	S12_xPool_down
22758	others		Ferritin-like domain		R96_xPool_down	RxS_96_up
17657	others		zinc-RING finger domain		R96_xPool_down
18675	others		WD repeat-containing protein		RxS_12_down
19356	others		WD repeat-containing protein		RxS_12_down	S12_xPool_down
19123	others		Alpha/beta hydrolase family		RxS_12_down	S12_xPool_down	S17d_xPool_down	S24_xPool_down	S96_xPool_down
418	others		BAH domain		RxS_12_down	S12_xPool_down	S24_xPool_down
13411	others		Catenin-beta-like, Arm-motif containing nuclear		RxS_12_down
9867	others		Membrane bound O-acyl transferase family		RxS_12_down
5951	others		Rhomboid family		RxS_12_down
8469	others		SH3 domain		RxS_12_down
7081	others		Zinc finger, C2H2 type		RxS_12_down	S17d_xPool_down
16167	others		Zinc-binding dehydrogenase		RxS_12_down
13819	others		Acetyltransferase (GNAT) family		RxS_12_up
16792	others		Arylesterase		RxS_12_up	S12_xPool_up
6406	others		Cleft lip and palate transmembrane protein 1 (CLPTM1)		RxS_12_up
7153	others		Enoyl-(Acyl carrier protein) reductase		RxS_12_up
23477	others		FHA domain		RxS_12_up
13563	others		GDP-GTP exchange factor		RxS_12_up	S12_xPool_up
21343	others		Growth-Arrest-Specific Protein 2 Domain		RxS_12_up	RxS_24_up
12402	others		Leucine rich repeat		RxS_12_up
4178	others		MBOAT, membrane-bound O-acyltransferase family		RxS_12_up
20643	others		Membrane bound O-acyl transferase family		RxS_12_up
8470	others		SH3 domain		RxS_12_up
14215	others		Tetratricopeptide repeat protein		RxS_12_up
11191	others		Yeast ABC1 protein		RxS_12_up
12687	others		Zinc finger protein		RxS_12_up	S12_xPool_up
4966	others		Carbonic anhydrase		RxS_17d_down	S17d_xPool_down
18483	others		O-methyltransferase		RxS_17d_down
4884	others		AAA ATPase		RxS_24_down
5994	others		Alkaline phosphatase		RxS_24_down
17429	others		Clustered mitochondria protein		RxS_24_down
2374	others		Hydrolase (Beta-lactamase)		RxS_24_down
13940	others		Macrophage erythroblast attacher-like protein		RxS_24_down
20645	others		Membrane bound O-acyl transferase family		RxS_24_down	RxS_96_down
9767	others		plus-3-domain-containing protein		RxS_24_down
17939	others		RINT-1 / TIP-1 family		RxS_24_down
17940	others		RINT-1 / TIP-1 family		RxS_24_down
8316	others		Ser-Thr-rich glycosyl-phosphatidyl-inositol-anchored membrane family		RxS_24_down	S24_xPool_down
23153	others		WD domain, G-beta repeat		RxS_24_down
4648	others		Yeast ABC1 protein		RxS_24_down
21650	others		Alpha/beta hydrolase family		RxS_24_up	S24_xPool_up
20278	others		CRAL/TRIO domain		RxS_24_up
2369	others		Hydrolase (Beta-lactamase)		RxS_24_up	S24_xPool_up
5462	others		Maintenance of mitochondrial morphology protein 1		RxS_24_up
28103	others		Rhodanese-like domain		RxS_24_up
22126	others		SH3 domain		RxS_24_up	S12_xPool_down	S17d_xPool_down
18556	others		YjeF-related protein		RxS_24_up	RxS_96_up
4355	others		Zinc finger, C3HC4 type (RING finger)		RxS_24_up
9162	others		Ankyrin repeat protein		RxS_96_down
28523	others		Domain of unknown function in PX-proteins (DUF3818)		RxS_96_down	S12_xPool_down	S24_xPool_down	S96_xPool_down
7596	others		Forkhead domain		RxS_96_down
20334	others		Tetratricopeptide repeat protein		RxS_96_down
13258	others		Cytochrome P450		RxS_96_up	S17d_xPool_down
26687	others		Leucine Rich repeat		RxS_96_up
20819	others		Methyltransferase		RxS_96_up
13188	others		SUZ domain		RxS_96_up
21296	others		Tetratricopeptide repeat		RxS_96_up
22536	others		BTB/POZ domain-containing protein		S12_xPool_down
3299	others		CRAL/TRIO domain		S12_xPool_down
13562	others		GDP-GTP exchange factor		S12_xPool_down	S24_xPool_down
446	others		GTPase-like		S12_xPool_down	S17d_xPool_down
14060	others		Ubiquitin-associated protein 2		S12_xPool_down
19355	others		WD repeat-containing protein		S12_xPool_up
20452	others		AAA ATPase		S12_xPool_up
7217	others		Ankyrin repeat protein		S12_xPool_up
22535	others		BTB/POZ domain-containing protein		S12_xPool_up	S17d_xPool_up
18103	others		Membrane bound O-acyl transferase family		S12_xPool_up
19754	others		ZPR1 zinc-finger domain		S12_xPool_up
16835	others		Alpha/beta hydrolase family		S17d_xPool_down
15552	others		Cytochrome P450		S17d_xPool_down
18485	others		O-methyltransferase		S17d_xPool_down
8317	others		Ser-Thr-rich glycosyl-phosphatidyl-inositol-anchored membrane family		S17d_xPool_down
6291	others		Methyltransferase		S17d_xPool_up
16919	others		Zinc finger, C2H2 type		S17d_xPool_up	S96_xPool_up
15057	others		AAA ATPase		S24_xPool_down
7367	others		Zinc finger, C2H2 type		S24_xPool_down
7369	others		Zinc finger, C2H2 type		S24_xPool_down
4883	others		AAA ATPase		S24_xPool_up	S96_xPool_up
10436	others		Cytochrome P450		S24_xPool_up
15311	others		Cytochrome P450	Secreted	S24_xPool_up
3366	others		F-box protein		S24_xPool_up
13022	others		Rhodanese-like domain		S24_xPool_up
23473	others		FHA domain		S96_xPool_down
21344	others		Growth-Arrest-Specific Protein 2 Domain		S96_xPool_down
11465	others		GTPase-like		S96_xPool_down
7205	others		lipin, N-terminal conserved region		S96_xPool_down
7799	others		Zinc-finger double domain		S96_xPool_down
12715	others		Ankyrin repeat protein		S96_xPool_up
22533	others		BTB/POZ domain-containing protein		S96_xPool_up
19746	others		cytochrome p450		S96_xPool_up
11464	others		GTPase-like		S96_xPool_up
16408	Oxidative phosphorylation		NADH-ubiquinone oxidoreductase B18 subunit (NDUFB7)		R12_xPool_down	R24_xPool_down	RxS_96_down	S12_xPool_down	S24_xPool_down	S96_xPool_down
9420	Oxidative phosphorylation		ATP synthase alpha/beta family, nucleotide-binding domain		R12_xPool_up	R24_xPool_up	RxS_24_down	S12_xPool_up	S17d_xPool_up
10018	Oxidative phosphorylation		Cytochrome b-c1 complex subunit Rieske		R12_xPool_up
9512	Oxidative phosphorylation		Cytochrome c		R12_xPool_up	S12_xPool_up
9513	Oxidative phosphorylation		cytochrome c		R12_xPool_up	S12_xPool_up
18737	Oxidative phosphorylation		Cytochrome c		R12_xPool_up
6471	Oxidative phosphorylation		Ferric/cupric reductase transmembrane component		R12_xPool_up	R96_xPool_up	S12_xPool_up	S96_xPool_up
28681	Oxidative phosphorylation		Ferric/cupric reductase transmembrane component		R12_xPool_up	S12_xPool_up	S24_xPool_up
10281	Oxidative phosphorylation		NADH-ubiquinone oxidoreductase 78 kDa subunit		R12_xPool_up	RxS_12_down	S17d_xPool_up
23558	Oxidative phosphorylation		NADH-ubiquinone oxidoreductase chain		R12_xPool_up	R17d_xPool_up	R24_xPool_up	R96_xPool_up	S12_xPool_up	S24_xPool_up	S96_xPool_up
23559	Oxidative phosphorylation		NADH-ubiquinone oxidoreductase chain		R12_xPool_up	R17d_xPool_up	R24_xPool_up	R96_xPool_up	S12_xPool_up	S24_xPool_up	S96_xPool_up
10280	Oxidative phosphorylation		NADH-ubiquinone oxidoreductase 78 kDa subunit		R24_xPool_down	RxS_24_up
6709	Oxidative phosphorylation		ATP synthase alpha/beta family, nucleotide-binding domain		R24_xPool_up	RxS_24_down
13417	Oxidative phosphorylation		ATP synthase subunit C		R24_xPool_up
9811	Oxidative phosphorylation		External alternative NADH-ubiquinone oxidoreductase		R24_xPool_up	S12_xPool_up	S24_xPool_up
13357	Oxidative phosphorylation		NADH-ubiquinone oxidoreductase 24 kDa subunit		R24_xPool_up	RxS_12_up	S12_xPool_up	S24_xPool_up
10308	Oxidative phosphorylation		Ferric/cupric reductase transmembrane component		R96_xPool_down	S96_xPool_down
9417	Oxidative phosphorylation		ATP synthase alpha/beta family, nucleotide-binding domain		R96_xPool_up	RxS_96_down
10338	Oxidative phosphorylation		Electron transfer flavoprotein-ubiquinone oxidoreductase, 4Fe-4S		R96_xPool_up
20250	Oxidative phosphorylation		ATP synthase (E/31 kDa) subunit		RxS_12_down
4388	Oxidative phosphorylation		Electron transfer flavoprotein domain		RxS_12_down	S12_xPool_down	S17d_xPool_down
4746	Oxidative phosphorylation		NADH-ubiquinone oxidoreductase chain		RxS_12_down
14351	Oxidative phosphorylation		Cytochrome b-c1 complex subunit 2		RxS_12_up	S17d_xPool_down
6609	Oxidative phosphorylation		ATP synthase		RxS_24_down	S24_xPool_down
2923	Oxidative phosphorylation		NADH-cytochrome b5 reductase 2		RxS_24_down
13414	Oxidative phosphorylation		ATP synthase subunit C		RxS_24_up
29726	Oxidative phosphorylation		External alternative NADH-ubiquinone oxidoreductase		RxS_24_up
4759	Oxidative phosphorylation		NADH-ubiquinone oxidoreductase chain 1		RxS_24_up
19679	Oxidative phosphorylation		fumarate reductase		RxS_96_down	S96_xPool_down
2922	Oxidative phosphorylation		NADH-cytochrome b5 reductase 2		RxS_96_up
18588	Oxidative phosphorylation		ATP synthase subunit C		S12_xPool_down
18596	Oxidative phosphorylation		NADH-ubiquinone oxidoreductase chain		S12_xPool_down	S17d_xPool_down
10282	Oxidative phosphorylation		NADH-ubiquinone oxidoreductase 78 kDa subunit		S12_xPool_up
18375	Oxidative phosphorylation		NADH-ubiquinone oxidoreductase chain		S12_xPool_up
4734	Oxidative phosphorylation		NADH-ubiquinone/plastoquinone oxidoreductase chain 6		S24_xPool_down
27217	Pathogenesis-related	Lignin degradation	Glyoxal oxidase N-terminus		R12_xPool_up	R96_xPool_up
6874	Pathogenesis-related		Lytic transglycolase	Secreted	R12_xPool_up
5829	Pathogenesis-related		Virulence protein SSD1 OS=Candida albicans (ribonuclease domain containing protein)		R12_xPool_up	R24_xPool_up	RxS_12_down	RxS_96_down	S24_xPool_up
5828	Pathogenesis-related		Virulence protein SSD1 OS=Candida albicans (ribonuclease domain containing protein)		R96_xPool_down	RxS_24_down	S24_xPool_down	S96_xPool_down
27752	Pathogenesis-related		Lytic transglycolase		R96_xPool_up	RxS_12_up	RxS_96_down	S12_xPool_up
4502	Pathogenesis-related		Surface antigen		RxS_12_down
5830	Pathogenesis-related		Virulence protein SSD1 OS=Candida albicans (ribonuclease domain containing protein)		RxS_12_up	RxS_24_up
27502	Pathogenesis-related	Lignin degradation	Glyoxal oxidase N-terminus		RxS_24_down
6873	Pathogenesis-related		Lytic transglycolase	Secreted	RxS_96_down
8696	Pathogenesis-related	Lignin degradation	Glyoxal oxidase N-terminus		RxS_96_up
27751	Pathogenesis-related		Lytic transglycolase		RxS_96_up
25762	Pathogenesis-related		rust transferred protein		RxS_96_up	S17d_xPool_up	S96_xPool_up
10881	Pathogenesis-related		CFEM domain		S17d_xPool_down
12353	Protein Metabolism	Protein degradation	E3 ubiquitin-protein ligase ubr1		R12_xPool_down	RxS_12_up	RxS_96_up
25009	Protein Metabolism	Protein degradation	Extracellular metalloproteinase	Secreted	R12_xPool_down	S12_xPool_down	S24_xPool_down
744	Protein Metabolism	Protein degradation	Metallopeptidase family M24		R12_xPool_down	RxS_12_up	RxS_96_down
13426	Protein Metabolism	Protein degradation	Peptidase M16		R12_xPool_down
5357	Protein Metabolism	Protein degradation	polyubiquitin		R12_xPool_down	S12_xPool_down
15584	Protein Metabolism	Protein degradation	Probable E3 ubiquitin-protein ligase		R12_xPool_down	R24_xPool_down	S24_xPool_down
9841	Protein Metabolism	Protein degradation	protease		R12_xPool_down	R24_xPool_down
15219	Protein Metabolism	Protein degradation	protease		R12_xPool_down	S12_xPool_down	S24_xPool_down
24305	Protein Metabolism	Protein degradation	protease		R12_xPool_down	RxS_12_up
7108	Protein Metabolism	Protein degradation	Proteasome activator complex subunit 4		R12_xPool_down	RxS_12_up	S24_xPool_down
80	Protein Metabolism	Protein degradation	Ubiquitin carboxyl-terminal hydrolase		R12_xPool_down	R96_xPool_down	S24_xPool_down	S96_xPool_down
85	Protein Metabolism	Protein degradation	Ubiquitin carboxyl-terminal hydrolase		R12_xPool_down	S96_xPool_down
703	Protein Metabolism	Protein degradation	Ubiquitin carboxyl-terminal hydrolase		R12_xPool_down	S24_xPool_down
22743	Protein Metabolism	Translation	Eukaryotic translation initiation factor eIF2A		R12_xPool_down	R24_xPool_down	S24_xPool_down
15801	Protein Metabolism	Translation	Putative glycine--tRNA ligase		R12_xPool_down	R24_xPool_down	RxS_17d_down	RxS_24_up	S12_xPool_down	S17d_xPool_down
21098	Protein Metabolism	Translation	tRNA synthetase		R12_xPool_down
7506	Protein Metabolism	Chaperone	DnaJ		R12_xPool_up	RxS_12_down	S17d_xPool_up
766	Protein Metabolism	Non-ribossomal peptide	Non-canonical non-ribosomal peptide synthetase		R12_xPool_up	R24_xPool_up	S24_xPool_up
16061	Protein Metabolism	Protein degradation	Cullin family		R12_xPool_up
11290	Protein Metabolism	Protein degradation	Eukaryotic aspartyl protease		R12_xPool_up	R24_xPool_up	RxS_24_down
12907	Protein Metabolism	Protein degradation	Peptide N-acetyl-beta-D-glucosaminyl asparaginase amidase A		R12_xPool_up	RxS_12_down
5048	Protein Metabolism	Protein degradation	protease		R12_xPool_up	S17d_xPool_up	S24_xPool_up
26981	Protein Metabolism	Protein degradation	protease		R12_xPool_up	R24_xPool_up	S12_xPool_up	S17d_xPool_up	S24_xPool_up	S96_xPool_up
17189	Protein Metabolism	Protein degradation	Ubiquitin carboxyl-terminal hydrolase		R12_xPool_up
18373	Protein Metabolism	Ribossome-related	30S ribosomal protein S12-B		R12_xPool_up	S12_xPool_up	S24_xPool_up	S96_xPool_up
14282	Protein Metabolism	Ribossome-related	Ribosomal protein L14p/L23e		R12_xPool_up	R24_xPool_up	RxS_12_down	RxS_24_down
14281	Protein Metabolism	Ribossome-related	Ribosomal Proteins L2, C-terminal domain		R12_xPool_up	RxS_12_down
1642	Protein Metabolism	Translation	Elongation factor Tu GTP binding domain		R12_xPool_up	RxS_12_down
8941	Protein Metabolism	N-linked protein glycosylation	Beta-1,4-mannosyltransferase		R24_xPool_down	S24_xPool_down
13841	Protein Metabolism	Protein degradation	OTU-like cysteine protease		R24_xPool_down
15857	Protein Metabolism	Chaperone	TCP-1/cpn60 chaperonin family		R24_xPool_up
22369	Protein Metabolism	Protein degradation	Peptidase family M1		R24_xPool_up
29149	Protein Metabolism	Protein degradation	protease		R24_xPool_up	RxS_24_down
24133	Protein Metabolism	Protein degradation	Serine carboxypeptidase		R24_xPool_up	RxS_24_down	S12_xPool_up
13181	Protein Metabolism	Protein degradation	Ubiquitin-conjugating enzyme		R24_xPool_up	S12_xPool_up	S17d_xPool_up
3690	Protein Metabolism	Protein degradation	UBX domain-containing protein		R24_xPool_up
24893	Protein Metabolism	Ribossome-related	Ribosomal protein L14		R24_xPool_up
26804	Protein Metabolism	Ribossome-related	Ribosomal protein S3, C-terminal domain		R24_xPool_up	S12_xPool_up	S17d_xPool_up
14898	Protein Metabolism	Translation	Translation initiation factor eIF3 subunit		R24_xPool_up	R96_xPool_up	S12_xPool_up	S17d_xPool_up	S96_xPool_up
15646	Protein Metabolism	Translation	tRNA synthetase		R24_xPool_up	S12_xPool_up
23375	Protein Metabolism	Translation	tRNA synthetase		R24_xPool_up	S12_xPool_up
10452	Protein Metabolism	Chaperone	Calnexin		R96_xPool_up	RxS_96_down
15581	Protein Metabolism	Protein degradation	Probable E3 ubiquitin-protein ligase		R96_xPool_up	RxS_96_down
18685	Protein Metabolism	Protein degradation	Serine aminopeptidase		R96_xPool_up	S96_xPool_up
6026	Protein Metabolism	Protein degradation	Serine carboxypeptidase	Secreted	R96_xPool_up
4119	Protein Metabolism		aminotransferase		R96_xPool_up	S12_xPool_up
12309	Protein Metabolism	Chaperone	TCP-1/cpn60 chaperonin family		RxS_12_down
10153	Protein Metabolism	folding	Cyclophilin type peptidyl-prolyl cis-trans isomerase/CLD		RxS_12_down	RxS_24_down
13470	Protein Metabolism	O-linked protein glycosylation	Dolichyl-phosphate-mannose-protein mannosyltransferase		RxS_12_down
6315	Protein Metabolism	Protein degradation	E3 ubiquitin-protein ligase		RxS_12_down	S12_xPool_down
18684	Protein Metabolism	Protein degradation	Serine aminopeptidase		RxS_12_down
14757	Protein Metabolism	Protein degradation	Ubiquitin-conjugating enzyme		RxS_12_down
17839	Protein Metabolism	Ribossome-related	Ribosomal protein S2		RxS_12_down	RxS_24_up
20634	Protein Metabolism	Translation	Cytoplasmic tRNA 2-thiolation protein 2		RxS_12_down
15647	Protein Metabolism	Translation	tRNA synthetase		RxS_12_down	RxS_96_down
10455	Protein Metabolism	Chaperone	TCP-1/cpn60 chaperonin family		RxS_12_up
8409	Protein Metabolism	Degradation	Proteassome subunit		RxS_12_up
18627	Protein Metabolism	N-linked protein glycosylation	Oligosaccharyltransferase subunit Ribophorin II		RxS_12_up
13644	Protein Metabolism	Pos-translational modification	NAD-dependent protein deacetylase hst4		RxS_12_up
746	Protein Metabolism	Protein degradation	Metallopeptidase family M24		RxS_12_up
747	Protein Metabolism	Protein degradation	Metallopeptidase family M24		RxS_12_up
28895	Protein Metabolism	Protein degradation	Probable E3 ubiquitin protein ligase		RxS_12_up
9320	Protein Metabolism	Protein degradation	protease		RxS_12_up
10016	Protein Metabolism	Protein degradation	protease	Secreted	RxS_12_up	RxS_24_down
28801	Protein Metabolism	Protein degradation	Serine aminopeptidase		RxS_12_up
23411	Protein Metabolism	Protein degradation	Ubiquitin-like-specific protease 2		RxS_12_up
18600	Protein Metabolism	Ribossome-related	Ribosomal L27 protein		RxS_12_up
9780	Protein Metabolism	Ribossome-related	Ribosome production factor		RxS_12_up
25899	Protein Metabolism	Translation	tRNA synthetase	Secreted	RxS_12_up
25902	Protein Metabolism	Translation	tRNA synthetase		RxS_12_up	S12_xPool_up
10993	Protein Metabolism	Chaperone	DnaJ		RxS_24_down
10154	Protein Metabolism	folding	Cyclophilin type peptidyl-prolyl cis-trans isomerase/CLD		RxS_24_down
13471	Protein Metabolism	O-linked protein glycosylation	Dolichyl-phosphate-mannose-protein mannosyltransferase		RxS_24_down	S24_xPool_down	S96_xPool_down
12338	Protein Metabolism	Protein degradation	Metallopeptidase family M24		RxS_24_down
5353	Protein Metabolism	Protein degradation	polyubiquitin	Secreted	RxS_24_down
5355	Protein Metabolism	Protein degradation	polyubiquitin		RxS_24_down
16325	Protein Metabolism	Protein degradation	protease		RxS_24_down
2102	Protein Metabolism	Protein degradation	Protease (Subtilase family)	Secreted	RxS_24_down
5222	Protein Metabolism	Protein degradation	Proteassome subunit		RxS_24_down
83	Protein Metabolism	Protein degradation	Ubiquitin carboxyl-terminal hydrolase		RxS_24_down	RxS_96_up	S24_xPool_down
20903	Protein Metabolism	Ribossome-related	37S ribosomal protein subunit sws2		RxS_24_down
9854	Protein Metabolism	Ribossome-related	Ribosomal protein L3		RxS_24_down
20049	Protein Metabolism	Ribossome-related	Ribosomal protein S8e		RxS_24_down
15335	Protein Metabolism	Translation	Elongation factor Tu GTP binding domain		RxS_24_down
28792	Protein Metabolism		Ribosomal lysine N-methyltransferase set11		RxS_24_down	S24_xPool_down
10152	Protein Metabolism	folding	Cyclophilin type peptidyl-prolyl cis-trans isomerase/CLD		RxS_24_up
13472	Protein Metabolism	O-linked protein glycosylation	Dolichyl-phosphate-mannose-protein mannosyltransferase		RxS_24_up
493	Protein Metabolism	Protein degradation	Dipeptidyl peptidase IV (DPP IV)		RxS_24_up	S17d_xPool_down
25007	Protein Metabolism	Protein degradation	Extracellular metalloproteinase	Secreted	RxS_24_up
3814	Protein Metabolism	Protein degradation	Putative aminopeptidase		RxS_24_up
82	Protein Metabolism	Protein degradation	Ubiquitin carboxyl-terminal hydrolase		RxS_24_up	S12_xPool_down	S96_xPool_down
84	Protein Metabolism	Protein degradation	Ubiquitin carboxyl-terminal hydrolase		RxS_24_up
17187	Protein Metabolism	Protein degradation	Ubiquitin carboxyl-terminal hydrolase		RxS_24_up
21236	Protein Metabolism	Translation	Elongation factor 1 gamma		RxS_24_up	RxS_96_down
7503	Protein Metabolism	Chaperone	DnaJ		RxS_96_down
11675	Protein Metabolism	Chaperone	Heat shock protein sti2		RxS_96_down
12503	Protein Metabolism	Protein folding	FAD-linked sulfhydryl oxidase		RxS_96_down
13593	Protein Metabolism	Translation	N-acetyltransferase B complex (NatB) non catalytic subunit		RxS_96_down
15685	Protein Metabolism	Chaperone	DnaJ	Secreted	RxS_96_up
11672	Protein Metabolism	Chaperone	Heat shock protein sti2		RxS_96_up
12308	Protein Metabolism	Chaperone	TCP-1/cpn60 chaperonin family		RxS_96_up
17914	Protein Metabolism	Protein degradation	protease		RxS_96_up	S96_xPool_up
26984	Protein Metabolism	Protein degradation	protease		RxS_96_up
4282	Protein Metabolism	Protein degradation	Protease (Subtilase family)		RxS_96_up
17242	Protein Metabolism	Protein degradation	Serine carboxypeptidase	Secreted	RxS_96_up
17243	Protein Metabolism	Protein degradation	Serine carboxypeptidase	Secreted	RxS_96_up
4116	Protein Metabolism	Ribossome-related	Ribosomal large subunit proteins 60S L5, and 50S L18		RxS_96_up
10974	Protein Metabolism	Ribossome-related	Ribosomal protein S17		RxS_96_up
20705	Protein Metabolism	Translation	Eukaryotic translation initiation factor 2 subunit gamma		RxS_96_up
18405	Protein Metabolism	Translation	tRNA synthetase		RxS_96_up
25898	Protein Metabolism	Translation	tRNA synthetase		RxS_96_up
26241	Protein Metabolism		aminotransferase		RxS_96_up
14714	Protein Metabolism	Protein degradation	Peptide N-acetyl-beta-D-glucosaminyl asparaginase amidase A		S12_xPool_down
22370	Protein Metabolism	Protein degradation	protease		S12_xPool_down	S24_xPool_down
7101	Protein Metabolism	Protein degradation	Proteasome activator complex subunit 4		S12_xPool_down	S24_xPool_down
26696	Protein Metabolism	Protein degradation	Proteasome subunit alpha type-7-like		S12_xPool_down
81	Protein Metabolism	Protein degradation	Ubiquitin carboxyl-terminal hydrolase		S12_xPool_down
20833	Protein Metabolism		aminotransferase		S12_xPool_down
14559	Protein Metabolism	Chaperone	prohibitin		S12_xPool_up
15953	Protein Metabolism	Protein degradation	Aspartyl aminopeptidase		S12_xPool_up
10470	Protein Metabolism	Protein folding	ATP11 protein	Secreted	S12_xPool_up
5399	Protein Metabolism	Translation	Probable eukaryotic translation initiation factor		S12_xPool_up
28951	Protein Metabolism		E3 ubiquitin-protein ligase		S12_xPool_up
21534	Protein Metabolism	Protein degradation	ERAD-associated E3 ubiquitin-protein ligase doa10		S17d_xPool_down
9384	Protein Metabolism	Protein degradation	Peptide N-acetyl-beta-D-glucosaminyl asparaginase amidase A		S17d_xPool_down
14713	Protein Metabolism	Protein degradation	Peptide N-acetyl-beta-D-glucosaminyl asparaginase amidase A		S17d_xPool_down
14715	Protein Metabolism	Protein degradation	Peptide N-acetyl-beta-D-glucosaminyl asparaginase amidase A		S17d_xPool_down	S24_xPool_down
17913	Protein Metabolism	Protein degradation	protease		S17d_xPool_down
6025	Protein Metabolism	Protein degradation	Serine carboxypeptidase	Secreted	S17d_xPool_down
23409	Protein Metabolism	Protein degradation	Ubiquitin-like-specific protease 2		S17d_xPool_down
10450	Protein Metabolism	Ribossome-related	Ribosomal protein S21		S17d_xPool_down
10295	Protein Metabolism	N-linked protein glycosylation	DIE2/ALG10 family		S17d_xPool_up
15377	Protein Metabolism	Protein degradation	Cullin family		S17d_xPool_up
3672	Protein Metabolism	Protein degradation	E3 ubiquitin ligase		S17d_xPool_up	S24_xPool_up
21222	Protein Metabolism	Protein degradation	Eukaryotic aspartyl protease		S17d_xPool_up
9961	Protein Metabolism	Protein degradation	Probable ubiquitin carboxyl-terminal hydrolase		S17d_xPool_up
14711	Protein Metabolism	Ribossome-related	37S ribosomal protein mrp10		S17d_xPool_up
24808	Protein Metabolism	Ribossome-related	Midasin		S17d_xPool_up	S96_xPool_up
18374	Protein Metabolism	Ribossome-related	Ribosomal protein S7p/S5e		S17d_xPool_up	S24_xPool_up	S96_xPool_up
15804	Protein Metabolism	Translation	Putative glycine--tRNA ligase		S17d_xPool_up
16331	Protein Metabolism	Protein degradation	Sentrin-specific protease 2		S24_xPool_down
15518	Protein Metabolism	Protein degradation	Ubiquitin-like modifier-activating enzyme		S24_xPool_down	S96_xPool_down
8024	Protein Metabolism	Protein degradation	protease		S24_xPool_up
20622	Protein Metabolism	Protein degradation	protease		S24_xPool_up
2100	Protein Metabolism	Protein degradation	Protease (Subtilase family)	Secreted	S24_xPool_up	S96_xPool_up
7106	Protein Metabolism	Protein degradation	Proteasome activator complex subunit 4		S24_xPool_up
5542	Protein Metabolism	Protein degradation	Ubiquitin-related		S24_xPool_up
28886	Protein Metabolism	Ribossome-related	Ribosomal protein L19e		S24_xPool_up
24843	Protein Metabolism		aminotransferase		S24_xPool_up
7359	Protein Metabolism	Protein degradation	Eukaryotic aspartyl protease	Secreted	S96_xPool_down
5005	Protein Metabolism	Protein degradation	Ubiquitin-related		S96_xPool_down
494	Protein Metabolism	Protein degradation	Dipeptidyl peptidase IV (DPP IV)		S96_xPool_up
3292	Redox		Alternative oxidase		R12_xPool_up
8005	Redox		glutathione dehydrogenase		R12_xPool_up
25919	Redox		Thioredoxin-like protein		R24_xPool_down
28675	Redox		Peroxidase	Secreted	R24_xPool_up	S17d_xPool_up	S24_xPool_up
29518	Redox		Peroxidase	Secreted	R24_xPool_up	S12_xPool_up	S17d_xPool_up	S24_xPool_up	S96_xPool_up
22389	Redox		Glutathione S-transferase, N-terminal domain		R96_xPool_up	RxS_96_down
5173	Redox		Aldo/keto reductase family		RxS_12_up
26389	Redox		laccase		RxS_12_up
20613	Redox		Thioredoxin-like protein		RxS_12_up
26388	Redox		laccase		RxS_24_up
3294	Redox		Alternative oxidase		S24_xPool_down
28674	Redox		Peroxidase	Secreted	S24_xPool_up	S96_xPool_up
29517	Redox		Peroxidase	Secreted	S24_xPool_up
10115	RNA metabolism	mRNA processing	Pre-mRNA-splicing factor RSE1		R12_xPool_down	RxS_12_up
7352	RNA metabolism	mRNA processing	Symplekin		R12_xPool_down	S12_xPool_down	S17d_xPool_down	S24_xPool_down
8106	RNA metabolism	RNA binding proteins	Oligouridylate-binding protein		R12_xPool_down
10068	RNA metabolism	RNA binding proteins	Oligouridylate-binding protein		R12_xPool_down
18342	RNA metabolism	RNA binding proteins	Oligouridylate-binding protein		R12_xPool_down	R96_xPool_down	RxS_24_down	RxS_96_up	S12_xPool_down	S24_xPool_down
9543	RNA metabolism	RNA binding proteins	RNA recognition motif containing-protein		R12_xPool_down	R96_xPool_down
14191	RNA metabolism	RNA binding proteins	RNA recognition motif containing-protein		R12_xPool_down	S12_xPool_down	S24_xPool_down
13187	RNA metabolism	RNA binding proteins	SUZ domain		R12_xPool_down	S17d_xPool_down	S24_xPool_down	S96_xPool_down
18922	RNA metabolism	RNA degradation	PIN domain		R12_xPool_down	S24_xPool_down	S96_xPool_down
11206	RNA metabolism	Rna processing	U3 small nucleolar RNA-associated protein		R12_xPool_down	R24_xPool_down	S12_xPool_down	S24_xPool_down
24311	RNA metabolism	Rna processing	U3 small nucleolar RNA-associated protein		R12_xPool_down	R17d_xPool_down	R24_xPool_down	S12_xPool_down	S24_xPool_down
15012	RNA metabolism	rRNA processing	Nucleolar complex-associated protein		R12_xPool_down	R24_xPool_down	S12_xPool_down	S96_xPool_down
6751	RNA metabolism	splicing	Splicing factor 3B subunit 1		R12_xPool_down	S12_xPool_down
9444	RNA metabolism	Transcription	RNA polymerase Rpb3/Rpb11 dimerisation domain		R12_xPool_down
3864	RNA metabolism	Transcription	Transcriptional regulatory protein SIN3		R12_xPool_down	S96_xPool_down
10002	RNA metabolism	Translation regulatin	Pumilio homolog		R12_xPool_down	R24_xPool_down	R96_xPool_down
19490	RNA metabolism		RNA helicase		R12_xPool_down	R24_xPool_down	RxS_12_up	S17d_xPool_down	S24_xPool_down
27325	RNA metabolism	mRNA processing	Protein VTS1		R12_xPool_up	R24_xPool_up	RxS_12_down
7351	RNA metabolism	mRNA processing	Symplekin		R12_xPool_up	S12_xPool_up	S17d_xPool_up
3794	RNA metabolism	RNA binding proteins	RNA recognition motif containing-protein		R12_xPool_up
7988	RNA metabolism	Rna processing	U3 small nucleolar RNA-associated protein 10		R12_xPool_up	S12_xPool_up
17312	RNA metabolism	Transcription	RNA polymerase I-associated factor PAF67		R12_xPool_up	S12_xPool_up
3246	RNA metabolism	Transcription	RNA polymerase Rpb2, domain 6		R12_xPool_up	RxS_12_down
2790	RNA metabolism	Transcription	transcription factor		R12_xPool_up	RxS_12_down	S96_xPool_up
20633	RNA metabolism	tRNA-related	Cytoplasmic tRNA 2-thiolation protein 2		R12_xPool_up	R24_xPool_up	RxS_24_down	S12_xPool_up
3132	RNA metabolism	Histones and associated proteins	Protein AF-9 homolog		R17d_xPool_down	R24_xPool_down	R96_xPool_down	RxS_24_up	S12_xPool_down
9903	RNA metabolism	rRNA processing	Pre-rRNA-processing protein esf1		R17d_xPool_down	R96_xPool_down
6894	RNA metabolism	mRNA processing	N6-adenosine-methyltransferase subunit (MT-A70)		R17d_xPool_up	S17d_xPool_up
17622	RNA metabolism	Transcription Factor	General negative regulator of transcription subunit 3		R17d_xPool_up
24647	RNA metabolism		RNA helicase		R17d_xPool_up	R96_xPool_up	RxS_96_down
18343	RNA metabolism	RNA binding proteins	Oligouridylate-binding protein		R24_xPool_down	RxS_96_down	S17d_xPool_down	S24_xPool_down	S96_xPool_down
3789	RNA metabolism	RNA binding proteins	RNA recognition motif containing-protein		R24_xPool_down
10901	RNA metabolism	Transcription	RNA polymerase III transcription factor (TF)IIIC subunit		R24_xPool_down	S12_xPool_down	S96_xPool_down
9443	RNA metabolism	Transcription	RNA polymerase Rpb3/Rpb11 dimerisation domain		R24_xPool_down	RxS_24_up
28051	RNA metabolism	mRNA processing	Poly(A) polymerase central domain		R24_xPool_up	RxS_24_down
3786	RNA metabolism	RNA binding proteins	RNA recognition motif containing-protein		R24_xPool_up	S24_xPool_up
26601	RNA metabolism	RNA silencing	argonaute		R24_xPool_up	S24_xPool_up
9902	RNA metabolism	rRNA processing	Pre-rRNA-processing protein esf1		R24_xPool_up	RxS_24_down
519	RNA metabolism	Transcription	RNA polymerase Rpb1, domain 1		R24_xPool_up
4611	RNA metabolism	Transcription	RNA polymerase Rpb1, domain 5		R24_xPool_up	S24_xPool_up	S96_xPool_up
9592	RNA metabolism	Transcription	Transcription factor/nuclear export subunit protein 2		R24_xPool_up
25924	RNA metabolism		RNA helicase		R96_xPool_up	S96_xPool_up
15860	RNA metabolism	mRNA processing	Nineteen complex-related protein 2		RxS_12_down	S12_xPool_down
15861	RNA metabolism	mRNA processing	Nineteen complex-related protein 2		RxS_12_down	RxS_24_down
770	RNA metabolism	mRNA processing	Pre-mRNA-processing-splicing factor		RxS_12_down	RxS_24_up	RxS_96_up	S12_xPool_down	S17d_xPool_down
8103	RNA metabolism	RNA binding proteins	Oligouridylate-binding protein		RxS_12_down	RxS_24_down
2901	RNA metabolism	RNA binding proteins	RNA recognition motif containing-protein		RxS_12_down
2903	RNA metabolism	RNA binding proteins	RNA recognition motif containing-protein		RxS_12_down
26598	RNA metabolism	RNA silencing	argonaute		RxS_12_down	RxS_96_up	S12_xPool_down
26208	RNA metabolism	Transcription	RNA polymerase II transcription factor B subunit 2		RxS_12_down	RxS_24_up
6836	RNA metabolism	Transcription	Transcription factor/nuclear export subunit protein 2		RxS_12_down
9347	RNA metabolism	Transcription	Transcription initiation factor IIA		RxS_12_down	RxS_24_down	S12_xPool_down	S24_xPool_down
231	RNA metabolism	Transcription	Transcription initiation factor TFIID subunit A		RxS_12_down
12823	RNA metabolism	Transcription	Transcription initiation factor TFIID subunit A		RxS_12_down
9050	RNA metabolism	Transcription Factor	Transcription factor RFX4		RxS_12_down
7696	RNA metabolism		RNA helicase		RxS_12_down	RxS_24_down
8788	RNA metabolism	Histones and associated proteins	SPT2 chromatin protein		RxS_12_up
18713	RNA metabolism	mRNA processing	mRNA cleavage and polyadenylation factor		RxS_12_up
15859	RNA metabolism	mRNA processing	Nineteen complex-related protein 2		RxS_12_up
771	RNA metabolism	mRNA processing	Pre-mRNA-processing-splicing factor		RxS_12_up	S12_xPool_up
776	RNA metabolism	mRNA processing	Pre-mRNA-splicing factor 8		RxS_12_up
23286	RNA metabolism	mRNA processing	Protein similar to CwfJ C-terminus 1		RxS_12_up
11315	RNA metabolism	Ribossome-related	Noc2p family		RxS_12_up
8107	RNA metabolism	RNA binding proteins	Oligouridylate-binding protein		RxS_12_up	S12_xPool_up
10089	RNA metabolism	RNA binding proteins	Putative RNA-binding protein		RxS_12_up	S12_xPool_up
19485	RNA metabolism	RNA binding proteins	RNA recognition motif containing protein		RxS_12_up
2900	RNA metabolism	RNA binding proteins	RNA recognition motif containing-protein		RxS_12_up
3791	RNA metabolism	RNA binding proteins	RNA recognition motif containing-protein		RxS_12_up
15586	RNA metabolism	RNA degradation	Mitochondrial degradasome RNA helicase subunit C terminal		RxS_12_up
1900	RNA metabolism	splicing	Pre-mRNA-splicing factor		RxS_12_up
13827	RNA metabolism	Transcription	DNA-directed RNA polymerases		RxS_12_up
11085	RNA metabolism	Transcription	Transcription mediator complex subunit Med12		RxS_12_up
14470	RNA metabolism	tRNA-related	Dihydrouridine synthase (Dus)		RxS_12_up
7288	RNA metabolism	tRNA-related	N2,N2-dimethylguanosine tRNA methyltransferase		RxS_12_up	S12_xPool_up
12900	RNA metabolism		RNA helicase	Secreted	RxS_12_up	S12_xPool_up
12903	RNA metabolism		RNA helicase		RxS_12_up
11401	RNA metabolism	mRNA processing	Pre-mRNA-splicing factor CLF1		RxS_24_down
25738	RNA metabolism	RNA binding proteins	RNA recognition motif containing protein		RxS_24_down
5947	RNA metabolism	RNA binding proteins	RNA recognition motif containing-protein		RxS_24_down	RxS_96_up
17081	RNA metabolism	Rna processing	ribonucleoprotein complex non-core subunit		RxS_24_down
10201	RNA metabolism	Transcription	RNA pol II accessory factor, Cdc73 family, C-terminal		RxS_24_down
10510	RNA metabolism	RNA degradation	Ribonuclease H2 non-catalytic subunit (Ylr154p-like)		RxS_24_up
12497	RNA metabolism	Rna processing	U3 small nucleolar RNA-associated protein		RxS_24_up
9346	RNA metabolism	Transcription	Transcription initiation factor IIA		RxS_24_up
7697	RNA metabolism		RNA helicase		RxS_24_up
25926	RNA metabolism		RNA helicase		RxS_24_up
19256	RNA metabolism	Transcription	CCR4-NOT transcription complex subunit 1 CAF1-binding domain		RxS_96_down	S96_xPool_down
23583	RNA metabolism	transcription	Mediator complex subunit 13 C-terminal		RxS_96_down
10117	RNA metabolism	mRNA processing	Pre-mRNA-splicing factor RSE1		RxS_96_up	S96_xPool_up
8105	RNA metabolism	RNA binding proteins	Oligouridylate-binding protein		RxS_96_up
19484	RNA metabolism	RNA binding proteins	RNA recognition motif containing protein		RxS_96_up	S12_xPool_down
3788	RNA metabolism	RNA binding proteins	RNA recognition motif containing-protein		RxS_96_up
18344	RNA metabolism	RNA binding proteins	RNA recognition motif containing-protein		RxS_96_up
5882	RNA metabolism	RNA degradation	Probable RNA exonuclease		RxS_96_up
13128	RNA metabolism	Rna processing	U1 small nuclear ribonucleoprotein of 70kDa MW N terminal		RxS_96_up
10658	RNA metabolism	rRNA processing	Nucleolar complex-associated protein		RxS_96_up
19259	RNA metabolism	Transcription	CCR4-NOT transcription complex subunit 1 CAF1-binding domain		RxS_96_up
6835	RNA metabolism	Transcription	Transcription factor/nuclear export subunit protein 2		RxS_96_up	S24_xPool_down
7064	RNA metabolism	RNA binding proteins	Polyadenylate-binding protein		S12_xPool_down
4552	RNA metabolism	Transcription	NLI interacting factor-like phosphatase		S12_xPool_down	S24_xPool_down
2586	RNA metabolism	Transcription	Recombining binding protein suppressor of hairless		S12_xPool_down	S17d_xPool_down	S24_xPool_down
11467	RNA metabolism		Poly(A) RNA polymerase		S12_xPool_down
4918	RNA metabolism	mRNA processing	Pre-mRNA-splicing factor prp1		S12_xPool_up
28337	RNA metabolism	RNA silencing	Dicer-like protein		S12_xPool_up
14312	RNA metabolism	rRNA processing	U3 small nucleolar ribonucleoprotein protein		S12_xPool_up	S24_xPool_up
6834	RNA metabolism	Transcription	Transcription factor/nuclear export subunit protein 2		S12_xPool_up
12901	RNA metabolism		RNA helicase	Secreted	S12_xPool_up
19976	RNA metabolism		RNA helicase		S17d_xPool_down
16796	RNA metabolism	mRNA processing	Endoribonuclease		S17d_xPool_up
6833	RNA metabolism	Transcription	Transcription factor/nuclear export subunit protein 2		S17d_xPool_up
10001	RNA metabolism	Translation regulatin	Pumilio homolog		S17d_xPool_up
18930	RNA metabolism	Transcription	Copper-dependent transcription regulator		S24_xPool_up	S96_xPool_up
13515	RNA metabolism		RNA helicase		S24_xPool_up
2556	RNA metabolism	mRNA processing	Pre-mRNA-splicing factor		S96_xPool_up
19257	RNA metabolism	Transcription	CCR4-NOT transcription complex subunit 1 CAF1-binding domain		S96_xPool_up
3862	RNA metabolism	Transcription	Transcriptional regulatory protein SIN3		S96_xPool_up
13514	RNA metabolism		RNA helicase		S96_xPool_up
7687	Secondary metabolites		Mycophenolic acid synthesis protein		R12_xPool_up
25023	Secondary metabolites		Hydroxyacylglutathione hydrolase		RxS_12_up	S12_xPool_up
13040	Secondary metabolites	Non-ribossomal peptide	Nonribosomal peptide synthetase		S12_xPool_down	S17d_xPool_down	S24_xPool_down
5662	Secondary metabolites	G-protein-related	Arrestin		S17d_xPool_down
12161	Secondary metabolites		Pentafunctional AROM polypeptide		S24_xPool_down
6968	Senescence and cell death	apoptosis	Inhibitor of apoptosis-promoting Bax1		RxS_24_up
1627	Signaling	G-protein-related	Regulator of G protein signaling domain		R12_xPool_down	R24_xPool_down	S12_xPool_down	S24_xPool_down
1629	Signaling	G-protein-related	Regulator of G protein signaling domain		R12_xPool_down	R24_xPool_down	RxS_24_up	S12_xPool_down
1630	Signaling	G-protein-related	Regulator of G protein signaling domain		R12_xPool_down	R24_xPool_down	S12_xPool_down	S17d_xPool_down	S24_xPool_down	S96_xPool_down
22294	Signaling	kinase	RIM15-related serine/threonine-protein kinase		R12_xPool_down	R96_xPool_down	RxS_96_up	S12_xPool_down
24408	Signaling	kinase	Sensor histidine kinase		R12_xPool_down	RxS_12_up	S17d_xPool_down
15660	Signaling	Phosphatase	PAP2 superfamily		R12_xPool_down	S12_xPool_down	S17d_xPool_down	S24_xPool_down
20051	Signaling	Phosphatase	Putative serine/threonine-protein phosphatase		R12_xPool_down	RxS_12_up
10794	Signaling	Phosphatase	Serine/threonine-protein phosphatase 2B	Secreted	R12_xPool_down	S24_xPool_down
5870	Signaling	Ras-pathway-related	GTPase-activator protein for Ras-like GTPase		R12_xPool_down	RxS_12_up	RxS_96_down	S96_xPool_down
10034	Signaling	Ras-pathway-related	GTPase-activator protein for Ras-like GTPase		R12_xPool_down	R24_xPool_down	S24_xPool_down
15650	Signaling	SNF1-related	Protein sip5		R12_xPool_down
14652	Signaling	Transcription	Fungal specific transcription factor domain	Secreted	R12_xPool_down	RxS_12_up
13078	Signaling	Transcription	General transcriptional corepressor		R12_xPool_down	RxS_17d_down	RxS_24_down	S17d_xPool_down	S24_xPool_down
8583	Signaling	Transcription Factor	Homeobox domain		R12_xPool_down	S12_xPool_down	S24_xPool_down
11869	Signaling		Engulfment and cell motility protein		R12_xPool_down	R24_xPool_down	S17d_xPool_down
12260	Signaling		GTP-binding protein rhoA		R12_xPool_down	RxS_12_up	S96_xPool_down
14594	Signaling		GTP-binding protein rhoA		R12_xPool_down	R24_xPool_down	S12_xPool_down	S17d_xPool_down	S24_xPool_down	S96_xPool_down
11827	Signaling		GTPase-activating protein		R12_xPool_down	R24_xPool_down	RxS_12_up	S17d_xPool_down	S24_xPool_down	S96_xPool_down
6556	Signaling		Protein kinase		R12_xPool_down	R24_xPool_down	S24_xPool_down	S96_xPool_down
6558	Signaling		Protein kinase		R12_xPool_down	S12_xPool_down	S96_xPool_down
6559	Signaling		Protein kinase		R12_xPool_down	R24_xPool_down	S17d_xPool_down	S24_xPool_down
7849	Signaling		Protein kinase		R12_xPool_down	RxS_12_up
22226	Signaling		Protein kinase		R12_xPool_down	S17d_xPool_down	S24_xPool_down
6034	Signaling		Ras-related protein Rab-4B		R12_xPool_down	R17d_xPool_down	R24_xPool_down	R96_xPool_down	RxS_24_up	RxS_96_up	S12_xPool_down
23400	Signaling	kinase	Casein kinase II regulatory subunit		R12_xPool_up	R96_xPool_up	RxS_24_up	S12_xPool_up	S17d_xPool_up	S24_xPool_up	S96_xPool_up
12871	Signaling	kinase	Probable inactive serine/threonine-protein kinase		R12_xPool_up	R24_xPool_up	S24_xPool_up
19736	Signaling	Transcription Factor	Homeobox domain		R12_xPool_up	R24_xPool_up	S12_xPool_up	S17d_xPool_up	S24_xPool_up	S96_xPool_up
10192	Signaling		14-3-3 protein		R12_xPool_up	S12_xPool_up
11498	Signaling		14-3-3 protein		R12_xPool_up	S17d_xPool_up
2765	Signaling		Protein kinase		R12_xPool_up	R24_xPool_up	RxS_24_down	S12_xPool_up
3402	Signaling		Protein kinase		R12_xPool_up
12203	Signaling		Protein kinase		R12_xPool_up	R24_xPool_up	S12_xPool_up	S24_xPool_up
27069	Signaling		Protein kinase		R12_xPool_up	R24_xPool_up	RxS_24_down	S12_xPool_up	S17d_xPool_up
19543	Signaling	G-protein-related	G-protein alpha subunit		R17d_xPool_up
16214	Signaling	membrane receptor	Bacterial signalling protein N terminal repeat		R24_xPool_down	R96_xPool_down	RxS_24_up	RxS_96_up
19570	Signaling	Phosphatase	PAP2 superfamily		R24_xPool_down
1979	Signaling		Protein kinase		R24_xPool_down	RxS_24_up
3405	Signaling		Protein kinase		R24_xPool_down	RxS_12_down	RxS_96_down	S12_xPool_down	S24_xPool_down	S96_xPool_down
6651	Signaling		Ras association (RalGDS/AF-6) domain		R24_xPool_down	S24_xPool_down
2000	Signaling		Ras-related protein Rab-4B		R24_xPool_down	RxS_24_up
4497	Signaling		Ras-related protein Rab-4B		R24_xPool_down	RxS_24_up
9429	Signaling		Rho-GTPase-activating protein		R24_xPool_down	S24_xPool_down
10033	Signaling	Ras-pathway-related	GTPase-activator protein for Ras-like GTPase		R24_xPool_up	S17d_xPool_up
10958	Signaling		Protein kinase		R24_xPool_up	R96_xPool_up	S12_xPool_up	S17d_xPool_up	S24_xPool_up	S96_xPool_up
6035	Signaling		Ras-related protein Rab-4B		R24_xPool_up	R96_xPool_up	RxS_96_down	S17d_xPool_up	S24_xPool_up
8584	Signaling	Transcription Factor	Homeobox domain		R96_xPool_up
12071	Signaling		Protein kinase		R96_xPool_up	RxS_96_down
13908	Signaling		Phospholipase D		RxS_12_down	S12_xPool_down
6575	Signaling		Protein kinase		RxS_12_down
13231	Signaling		Protein kinase		RxS_12_down
14049	Signaling		Protein kinase		RxS_12_down	S12_xPool_down
6033	Signaling		Ras-related protein Rab-4B		RxS_12_down
29419	Signaling	kinase	protein kinase		RxS_12_up
22295	Signaling	kinase	RIM15-related serine/threonine-protein kinase		RxS_12_up	S12_xPool_up
22298	Signaling	kinase	RIM15-related serine/threonine-protein kinase		RxS_12_up	S12_xPool_up
12589	Signaling	Phosphatase	Dual specificity phosphatase		RxS_12_up	S17d_xPool_down
23600	Signaling	Transcription Factor	bZIP transcription factor		RxS_12_up
23601	Signaling	Transcription Factor	bZIP transcription factor		RxS_12_up
14583	Signaling		GTP-binding protein rhoA		RxS_12_up	S12_xPool_up	S17d_xPool_up
14590	Signaling		GTP-binding protein rhoA		RxS_12_up	RxS_24_down
2889	Signaling		Protein kinase		RxS_12_up
4544	Signaling		Protein kinase		RxS_12_up	S12_xPool_up
9165	Signaling		Protein kinase		RxS_12_up
29786	Signaling		Protein kinase		RxS_12_up	S17d_xPool_down
25375	Signaling		Serum response factor homolog		RxS_12_up
25290	Signaling		Striatin family		RxS_12_up	S12_xPool_up
19537	Signaling	G-protein-related	G-protein alpha subunit		RxS_24_down
1628	Signaling	G-protein-related	Regulator of G protein signaling domain		RxS_24_down
9809	Signaling	kinase	5'-AMP-activated protein kinase subunit gamma		RxS_24_down
26120	Signaling	Transcription	Fungal specific transcription factor domain		RxS_24_down
18872	Signaling	Transcription Factor	HMG (high mobility group) box		RxS_24_down
22685	Signaling		GTP-binding protein rhoA		RxS_24_down
3311	Signaling		Protein kinase		RxS_24_down	S24_xPool_down
7840	Signaling		Protein kinase		RxS_24_down
26104	Signaling		Protein kinase		RxS_24_down
27558	Signaling		Protein kinase		RxS_24_down
25372	Signaling		Serum response factor homolog		RxS_24_down
28120	Signaling	Transcription Factor	General negative regulator of transcription subunit 4		RxS_24_up	S24_xPool_up
19737	Signaling	Transcription Factor	Homeobox domain		RxS_24_up
10191	Signaling		14-3-3 protein		RxS_24_up
7419	Signaling		GTPase-activating protein		RxS_24_up
23076	Signaling		GTPase-activating protein		RxS_24_up
23077	Signaling		GTPase-activating protein	Secreted	RxS_24_up
536	Signaling		Protein kinase		RxS_24_up
2883	Signaling		Protein kinase		RxS_24_up
3406	Signaling		Protein kinase		RxS_24_up
11517	Signaling		Protein kinase		RxS_24_up
26786	Signaling		Protein kinase		RxS_24_up
22486	Signaling		Ras-related protein Rab-4B		RxS_24_up
9427	Signaling		Rho-GTPase-activating protein		RxS_24_up	S24_xPool_up
14593	Signaling		GTP-binding protein rhoA		RxS_96_down
19465	Signaling	Hormone	Abscisic acid G-protein coupled receptor		RxS_96_up
3972	Signaling	kinase	AGC/PKC protein kinase		RxS_96_up
24859	Signaling	kinase	cAMP-dependent protein kinase regulatory subunit		RxS_96_up
12869	Signaling	kinase	Probable inactive serine/threonine-protein kinase		RxS_96_up
10959	Signaling	kinase	Serine/threonine-protein kinase		RxS_96_up
16212	Signaling	membrane receptor	Bacterial signalling protein N terminal repeat		RxS_96_up	S96_xPool_up
13077	Signaling	Transcription	General transcriptional corepressor		RxS_96_up
2763	Signaling		Protein kinase		RxS_96_up
2890	Signaling		Protein kinase		RxS_96_up
3397	Signaling		Protein kinase		RxS_96_up
11112	Signaling	kinase	protein kinase		S12_xPool_down	S24_xPool_down
3976	Signaling	Signaling cascades	Protein kinase C		S12_xPool_down
8585	Signaling	Transcription Factor	Homeobox domain		S12_xPool_down	S17d_xPool_down
7418	Signaling		GTPase-activating protein		S12_xPool_down	S24_xPool_down	S96_xPool_down
4543	Signaling		Protein kinase		S12_xPool_down
6557	Signaling		Protein kinase		S12_xPool_down	S96_xPool_down
7573	Signaling		Protein kinase		S12_xPool_down
22227	Signaling		Protein kinase		S12_xPool_down
12204	Signaling	kinase	CAMP-dependent protein kinase		S12_xPool_up
12592	Signaling	Phosphatase	Dual specificity phosphatase		S12_xPool_up
15656	Signaling	Phosphatase	PAP2 superfamily		S12_xPool_up
11776	Signaling	Phosphatase	protein phosphatase 2A activator		S12_xPool_up
11501	Signaling		14-3-3 protein		S12_xPool_up
14585	Signaling		GTP-binding protein rhoA		S12_xPool_up	S17d_xPool_up
13909	Signaling		Phospholipase D		S12_xPool_up
10219	Signaling		Protein kinase		S12_xPool_up
12416	Signaling		Protein kinase		S12_xPool_up
15015	Signaling		Protein kinase		S12_xPool_up
1999	Signaling		Ras-related protein Rab-4B		S12_xPool_up
6791	Signaling	G-protein-related	G-protein alpha subunit		S17d_xPool_down
1438	Signaling	inositol	Myo-inositol-1-phosphate synthase		S17d_xPool_down	S24_xPool_down
15658	Signaling	Phosphatase	PAP2 superfamily		S17d_xPool_down	S24_xPool_down
3583	Signaling	Transcription Factor	Heat shock factor (HSF)		S17d_xPool_down
14173	Signaling		Cyclic nucleotide phosphodiesterase		S17d_xPool_down
29648	Signaling		Engulfment and cell motility protein		S17d_xPool_down
29649	Signaling		Engulfment and cell motility protein		S17d_xPool_down
8510	Signaling		Phospholipase D		S17d_xPool_down
537	Signaling		Protein kinase	secreted	S17d_xPool_down
3275	Signaling		Protein kinase		S17d_xPool_down
6466	Signaling		Protein kinase		S17d_xPool_down
11922	Signaling		Protein kinase		S17d_xPool_down
262	Signaling		Rho-GTPase-activating protein		S17d_xPool_down
2824	Signaling		Rho-GTPase-activating protein		S17d_xPool_down
24253	Signaling	kinase	protein kinase		S17d_xPool_up
12695	Signaling	Transcription	Fungal specific transcription factor domain		S17d_xPool_up
5168	Signaling	Transcription Factor	bZIP transcription factor		S17d_xPool_up
21429	Signaling	Transcription Factor	fungal-type transcription factor		S17d_xPool_up
14855	Signaling	Transcription Factor	HMG (high mobility group) box		S17d_xPool_up	S24_xPool_up	S96_xPool_up
16115	Signaling		Dedicator of cytokinesis protein		S17d_xPool_up
538	Signaling		Protein kinase		S17d_xPool_up
8088	Signaling		Protein kinase		S17d_xPool_up
16160	Signaling	cAMP-dependent pathway	Adenylate cyclase		S24_xPool_down
19544	Signaling	G-protein-related	G-protein alpha subunit		S24_xPool_down
26331	Signaling	kinase	protein kinase		S24_xPool_down
3508	Signaling	kinase	Serine/threonine-protein kinase		S24_xPool_down
15651	Signaling	Phosphatase	PAP2 superfamily		S24_xPool_down
16114	Signaling		Dedicator of cytokinesis protein		S24_xPool_down
12802	Signaling	Phosphatase	PP2A		S24_xPool_up
14849	Signaling	Transcription Factor	HMG (high mobility group) box		S24_xPool_up
3400	Signaling		Protein kinase		S24_xPool_up
8985	Signaling		Protein kinase		S24_xPool_up
25300	Signaling		Protein kinase		S24_xPool_up
29271	Signaling		Protein kinase		S24_xPool_up
11113	Signaling	kinase	protein kinase		S96_xPool_down
3973	Signaling	Signaling cascades	Protein kinase C		S96_xPool_down
946	Signaling		Protein kinase		S96_xPool_down
15751	Signaling	Phosphatase	Dual specificity phosphatase		S96_xPool_up
6103	Signaling		Protein kinase		S96_xPool_up
12064	Signaling		Protein kinase		S96_xPool_up
13857	Stress		Stress response protein nst2		R12_xPool_down	RxS_24_down	RxS_96_up	S12_xPool_down	S24_xPool_down
17046	Stress	osmoprotection	Oxygen-dependent choline dehydrogenase		R12_xPool_up	S12_xPool_up
13995	Stress	oxidative stress	superoxide dismutases		R12_xPool_up	R17d_xPool_up	R24_xPool_up	RxS_24_down	S12_xPool_up
7140	Stress		catalase		R12_xPool_up
22292	Stress		Cytokine-induced anti-apoptosis inhibitor 1, Fe-S biogenesis		R12_xPool_up
5563	Stress	Heat shock protein	Hsp70 protein		R24_xPool_up	RxS_24_down	S17d_xPool_up
18421	Stress	Heat shock protein	Hsp70 protein		R24_xPool_up	RxS_24_down
5562	Stress	Heat shock protein	Hsp70 protein		RxS_12_down
19395	Stress	oxidative stress	Indigoidine synthase A like protein		RxS_12_down
17049	Stress	osmoprotection	Oxygen-dependent choline dehydrogenase		RxS_12_up
5559	Stress	Heat shock protein	Hsp70 protein		RxS_24_down
8338	Stress	Heat shock protein	Hsp70 protein		RxS_24_down
8862	Stress	Heat shock protein	Hsp70 protein		RxS_24_down	RxS_96_up
15793	Stress	oxidative stress	Microsomal glutathione S-transferase		RxS_24_up	S24_xPool_up
22290	Stress		Cytokine-induced anti-apoptosis inhibitor 1, Fe-S biogenesis		RxS_24_up
13859	Stress		Stress response protein nst1		RxS_24_up
8341	Stress	Heat shock protein	Hsp70 protein		S12_xPool_up
13386	Stress	Heat shock protein	Hsp70 protein		S12_xPool_up
18422	Stress	Heat shock protein	Hsp70 protein		S12_xPool_up	S17d_xPool_up
4083	Stress	response to oxidative stress	Calcipressin		S12_xPool_up
4839	Stress	Virus induced	Temperature dependent protein affecting M2 dsRNA replication (MKT1)		S12_xPool_up
19394	Stress	oxidative stress	Indigoidine synthase A like protein		S17d_xPool_down
20406	Stress	osmoprotection	Oxygen-dependent choline dehydrogenase		S24_xPool_up
10705	Stress		Cation efflux family (Metal tolerance protein)		S24_xPool_up
8723	Transport	Nuclear transport	Importin alpha re-exporter		R12_xPool_down	R24_xPool_down	R96_xPool_down	RxS_12_up	S24_xPool_down
6342	Transport		Calcium dependent channel		R12_xPool_down	R17d_xPool_down	R24_xPool_down	R96_xPool_down	S12_xPool_down	S17d_xPool_down	S24_xPool_down
7041	Transport		Major Facilitator Superfamily		R12_xPool_down
1094	Transport		Manganese-transporting ATPase	Secreted	R12_xPool_down	R24_xPool_down	S12_xPool_down	S24_xPool_down
1098	Transport		Manganese-transporting ATPase		R12_xPool_down	RxS_12_up
14394	Transport		Mechanosensitive ion channel protein		R12_xPool_down	R24_xPool_down
12618	Transport		Oligopeptide transporter		R12_xPool_down	R24_xPool_down
10624	Transport		Phospholipid-translocating P-type ATPase C-terminal		R12_xPool_down	S24_xPool_down
7518	Transport		Sodium/calcium exchanger protein		R12_xPool_down	R24_xPool_down	S12_xPool_down	S17d_xPool_down	S24_xPool_down
7519	Transport		Sodium/calcium exchanger protein		R12_xPool_down	S12_xPool_down
2608	Transport	Mitochondrial transport	Mitochondrial carrier protein		R12_xPool_up
20057	Transport	Nuclear transport	Importin		R12_xPool_up	S24_xPool_up
17549	Transport		ABC transporter		R12_xPool_up	S17d_xPool_up
6338	Transport		Calcium dependent channel		R12_xPool_up	RxS_12_down	S24_xPool_up
8675	Transport		Plasma membrane ATPase 2		R12_xPool_up	S12_xPool_up
11657	Transport		V-type ATPase 116kDa subunit family		R12_xPool_up	S12_xPool_up
25031	Transport	Nuclear transport	importin		R17d_xPool_up	RxS_17d_down
11003	Transport		ABC transporter		R24_xPool_down	RxS_24_up	S17d_xPool_down
6064	Transport		Fungal potassium channel		R24_xPool_down	RxS_24_up
20757	Transport		Membrane transport protein		R24_xPool_down
9482	Transport		Stretch-activated Ca2+-permeable channel component		R24_xPool_down	RxS_12_down	RxS_24_up	S12_xPool_down
18137	Transport		V-ATPase subunit C	Secreted	R24_xPool_down	RxS_24_up
24941	Transport		ABC transporter		R24_xPool_up	RxS_24_down
7733	Transport		aquaporin		R24_xPool_up	RxS_24_down
7734	Transport		aquaporin		R24_xPool_up	R96_xPool_up	S24_xPool_up	S96_xPool_up
7735	Transport		aquaporin		R24_xPool_up	S24_xPool_up	S96_xPool_up
7736	Transport		aquaporin		R24_xPool_up
19927	Transport		Major Facilitator Superfamily		R24_xPool_up	RxS_24_down	S12_xPool_up
3719	Transport		Oligopeptide transporter		R24_xPool_up	RxS_24_down
9399	Transport		Oligopeptide transporter		R24_xPool_up
8590	Transport		Magnesium transporter NIPA		R96_xPool_down	RxS_96_up	S17d_xPool_down	S24_xPool_down
1095	Transport		Manganese-transporting ATPase		R96_xPool_down
12233	Transport	Mitochondrial transport	Mitochondrial carrier protein		R96_xPool_up
7732	Transport		aquaporin		R96_xPool_up	RxS_96_down	S24_xPool_up
12230	Transport	Mitochondrial transport	Mitochondrial carrier protein		RxS_12_down
22952	Transport	Mitochondrial transport	Mitochondrial carrier protein		RxS_12_down
29811	Transport	Mitochondrial transport	Mitochondrial carrier protein		RxS_12_down
29812	Transport	Mitochondrial transport	Mitochondrial carrier protein		RxS_12_down
16527	Transport	Nuclear pore complex	NUP50 (Nucleoporin 50 kDa)		RxS_12_down
18727	Transport	Nuclear transport	Exportin 1-like protein		RxS_12_down	RxS_24_down	S12_xPool_down	S24_xPool_down
11266	Transport		aquaporin	Secreted	RxS_12_down
7811	Transport		Major Facilitator Superfamily		RxS_12_down
22954	Transport	Mitochondrial transport	Mitochondrial carrier protein		RxS_12_up
29810	Transport	Mitochondrial transport	Mitochondrial carrier protein		RxS_12_up
8966	Transport	Nuclear pore complex	Nuclear pore complex assembly		RxS_12_up
11080	Transport	Nuclear pore complex	Nucleoporin subcomplex protein binding to Pom34		RxS_12_up
15043	Transport	Nuclear transport	Importin		RxS_12_up	S12_xPool_up
8721	Transport	Nuclear transport	Importin alpha re-exporter		RxS_12_up	S12_xPool_up	S17d_xPool_up	S96_xPool_up
8724	Transport	Nuclear transport	Importin alpha re-exporter		RxS_12_up	RxS_96_up	S17d_xPool_down
3043	Transport		ABC transporter		RxS_12_up
28283	Transport		ABC transporter		RxS_12_up
3829	Transport		Ctr copper transporter family		RxS_12_up
14696	Transport		Endomembrane protein 70		RxS_12_up
14698	Transport		Endomembrane protein 70		RxS_12_up
11996	Transport		Major Facilitator Superfamily		RxS_12_up
16545	Transport		Major Facilitator Superfamily		RxS_12_up	S17d_xPool_down
27064	Transport		Major Facilitator Superfamily		RxS_12_up
11142	Transport		Peroxisomal membrane protein		RxS_12_up
10634	Transport		Phospholipid-translocating ATPase N-terminal		RxS_12_up
17730	Transport		Potassium-transporting ATPase alpha chain		RxS_12_up	RxS_96_down
12017	Transport		Sodium/calcium exchanger protein		RxS_12_up
17728	Transport		Sodium/potassium-transporting ATPase		RxS_12_up
22955	Transport	Mitochondrial transport	Mitochondrial carrier protein		RxS_24_down
22957	Transport	Mitochondrial transport	Mitochondrial carrier protein		RxS_24_down
2863	Transport		ABC transporter		RxS_24_down
11001	Transport		ABC transporter		RxS_24_down
6339	Transport		Calcium dependent channel		RxS_24_down	S24_xPool_down
8635	Transport		Citrate transporter		RxS_24_down
12002	Transport		Major Facilitator Superfamily		RxS_24_down
12891	Transport		Major Facilitator Superfamily		RxS_24_down
16546	Transport		Major Facilitator Superfamily		RxS_24_down
28795	Transport		Mechanosensitive ion channel		RxS_24_down	S24_xPool_down	S96_xPool_down
20928	Transport		Solute carrier family 12		RxS_24_down
9481	Transport		Stretch-activated Ca2+-permeable channel component		RxS_24_down
29813	Transport	Mitochondrial transport	Mitochondrial carrier protein		RxS_24_up
18824	Transport		ABC transporter		RxS_24_up	S24_xPool_up
1500	Transport		Bestrophin, RFP-TM, chloride channel		RxS_24_up	S24_xPool_up
12885	Transport		Major Facilitator Superfamily		RxS_24_up	S24_xPool_up	S96_xPool_up
12018	Transport		Sodium/calcium exchanger protein		RxS_24_up
20930	Transport		Solute carrier family 12		RxS_24_up
17264	Transport		V-ATPase subunit H		RxS_24_up	S24_xPool_up	S96_xPool_up
22953	Transport	Mitochondrial transport	Mitochondrial carrier protein		RxS_96_down
5345	Transport	Nuclear transport	mRNA export factor		RxS_96_up	S24_xPool_down
27101	Transport		Major Facilitator Superfamily		RxS_96_up	S96_xPool_up
14392	Transport		Mechanosensitive ion channel	Secreted	RxS_96_up
17729	Transport		Sodium/potassium-transporting ATPase		RxS_96_up	S96_xPool_up
14770	Transport	Nuclear pore complex	Nucleoporin		S12_xPool_down
11418	Transport	Nuclear transport	Transportin		S12_xPool_down	S24_xPool_down
21164	Transport		ABC transporter		S12_xPool_down	S24_xPool_down
17935	Transport		CorA-like Mg2+ transporter protein		S12_xPool_down
16749	Transport		LETM1-like protein		S12_xPool_down
8591	Transport		Magnesium transporter NIPA		S12_xPool_down	S24_xPool_down
25523	Transport		Sulfate permease family		S12_xPool_down	S17d_xPool_down	S24_xPool_down
15045	Transport	Nuclear transport	importin		S12_xPool_up	S17d_xPool_up
20064	Transport	Nuclear transport	Importin		S12_xPool_up	S17d_xPool_up
13050	Transport		ABC transporter		S12_xPool_up
4036	Transport		Oligopeptide transporter		S12_xPool_up
10760	Transport		Oligopeptide transporter		S12_xPool_up
4672	Transport	Nuclear pore complex	Nuclear pore complex assembly		S17d_xPool_down
27806	Transport	Nuclear transport	importin		S17d_xPool_down
6063	Transport		Fungal potassium channel		S17d_xPool_down	S24_xPool_down
6473	Transport		Major Facilitator Superfamily		S17d_xPool_down
11999	Transport		Major Facilitator Superfamily		S17d_xPool_down
12000	Transport		Major Facilitator Superfamily		S17d_xPool_down
19928	Transport		Major Facilitator Superfamily		S17d_xPool_down
21251	Transport		Sodium/calcium exchanger protein		S17d_xPool_down
14104	Transport		Triose-phosphate Transporter family		S17d_xPool_down
11654	Transport		V-type ATPase 116kDa subunit family		S17d_xPool_down
8337	Transport	Nuclear pore complex	Nuclear transport factor 2 (NTF2) domain		S17d_xPool_up
23993	Transport	Nuclear pore complex	Nuclear transport factor 2 (NTF2) domain		S17d_xPool_up
23633	Transport		ABC transporter		S17d_xPool_up
10866	Transport		Amino acid permease		S17d_xPool_up
6341	Transport		Calcium dependent channel		S17d_xPool_up
2333	Transport		Major Facilitator Superfamily		S17d_xPool_up
7532	Transport		Major Facilitator Superfamily		S17d_xPool_up
12600	Transport		Major Facilitator Superfamily		S17d_xPool_up
15352	Transport		Major Facilitator Superfamily		S17d_xPool_up
15715	Transport		Major Facilitator Superfamily		S17d_xPool_up
16858	Transport		Major Facilitator Superfamily		S17d_xPool_up
27433	Transport		Major Facilitator Superfamily		S17d_xPool_up
11707	Transport		Plastidal glycolate/glycerate translocator 1		S17d_xPool_up
19140	Transport		Triose-phosphate Transporter family		S17d_xPool_up
3681	Transport		ABC transporter		S24_xPool_down	S96_xPool_down
6340	Transport		Calcium dependent channel		S24_xPool_up
20596	Transport		HCO3- transporter family		S24_xPool_up
28794	Transport		Mechanosensitive ion channel		S24_xPool_up
8965	Transport	Nuclear pore complex	Nuclear pore complex assembly		S96_xPool_down
27762	Transport		Ammonium Transporter Family		S96_xPool_down
27377	Transport		Sodium/hydrogen exchanger family		S96_xPool_down
1246	Transport	Mitochondrial transport	Mitochondrial carrier protein		S96_xPool_up
10492	Transport	Nuclear pore complex	Nucleoporin		S96_xPool_up
14695	Transport		Endomembrane protein 70		S96_xPool_up
16547	Transport		Major Facilitator Superfamily		S96_xPool_up
8843	Transport		Organic solute transporter Ostalpha		S96_xPool_up
9738	Transposable element		gypsy		R12_xPool_down
9898	Transposable element		TY1_Copia		R12_xPool_down	R24_xPool_down	RxS_24_up	S12_xPool_down	S96_xPool_down
10498	Transposable element		TY1_Copia		R12_xPool_down	S12_xPool_down	S24_xPool_down
10650	Transposable element		TY1_Copia		R12_xPool_down
15526	Transposable element		TY1_Copia		R12_xPool_down
20874	Transposable element		TY1_Copia		R12_xPool_down
22851	Transposable element		TY1_Copia		R12_xPool_down
23921	Transposable element		gypsy		R12_xPool_up	RxS_24_up	S24_xPool_up
3704	Transposable element		Retrotransposon-related		R12_xPool_up	S96_xPool_up
8924	Transposable element		TPSI_cacta		R12_xPool_up	R17d_xPool_up	R24_xPool_up	R96_xPool_up	RxS_24_down
3374	Transposable element		TY1_Copia		R12_xPool_up	S96_xPool_up
9905	Transposable element		TY1_Copia		R12_xPool_up	R24_xPool_up	S17d_xPool_up	S96_xPool_up
14150	Transposable element		TY1_Copia		R12_xPool_up	R24_xPool_up	R96_xPool_up	RxS_96_down	S12_xPool_up	S17d_xPool_up	S24_xPool_up
15077	Transposable element		LINE		R24_xPool_up
3338	Transposable element		LINE		RxS_12_down
6135	Transposable element		TY1_Copia		RxS_12_down
11903	Transposable element		TY1_Copia		RxS_12_down	RxS_24_down
23606	Transposable element		TY1_Copia		RxS_12_down
734	Transposable element		gypsy		RxS_12_up
3589	Transposable element		gypsy		RxS_12_up
638	Transposable element		TransposonPSI ISC1316		RxS_12_up
13808	Transposable element		TY1_Copia		RxS_12_up
20428	Transposable element		TY1_Copia		RxS_12_up	S12_xPool_up
22060	Transposable element		TY1_Copia		RxS_12_up	RxS_24_down
3472	Transposable element		LINE		RxS_96_down
13133	Transposable element		TY1_Copia		RxS_96_up
19624	Transposable element		TY1_Copia		RxS_96_up
4026	Transposable element		Retrotransposon-related		S12_xPool_up
21174	Transposable element		TY1_Copia		S12_xPool_up
9900	Transposable element		Retrotransposon-related		S17d_xPool_down
12139	Transposable element		TY1_Copia		S17d_xPool_down
13688	Transposable element		gypsy		S17d_xPool_up
19882	Transposable element		TPSI_cacta		S17d_xPool_up
12741	Transposable element		TY1_Copia		S17d_xPool_up
18884	Transposable element		TY1_Copia		S17d_xPool_up
19788	Transposable element		TY1_Copia		S17d_xPool_up
26214	Transposable element		TY1_Copia		S17d_xPool_up
5446	Transposable element		Retrotransposon-related		S24_xPool_down	S96_xPool_down
18465	Transposable element		Copia		S24_xPool_up
6158	Transposable element		TY1_Copia		S24_xPool_up
14517	Transposable element		TY1_Copia		S96_xPool_down
1272	unknown		hypothetical protein		R12_xPool_down
2942	unknown		hypothetical protein		R12_xPool_down	S12_xPool_down	S17d_xPool_down	S24_xPool_down
3197	unknown		hypothetical protein		R12_xPool_down	S17d_xPool_down
6673	unknown		hypothetical protein		R12_xPool_down	R24_xPool_down	S12_xPool_down	S17d_xPool_down	S24_xPool_down	S96_xPool_down
6861	unknown		hypothetical protein		R12_xPool_down	S96_xPool_down
9242	unknown		hypothetical protein		R12_xPool_down
9890	unknown		hypothetical protein		R12_xPool_down	R24_xPool_down
10031	unknown		hypothetical protein		R12_xPool_down	RxS_12_up	RxS_96_up	S17d_xPool_down
11359	unknown		hypothetical protein		R12_xPool_down
11432	unknown		hypothetical protein		R12_xPool_down	S12_xPool_down	S17d_xPool_down
12680	unknown		hypothetical protein		R12_xPool_down	R24_xPool_down	S12_xPool_down
13216	unknown		hypothetical protein		R12_xPool_down
13349	unknown		hypothetical protein		R12_xPool_down	R24_xPool_down	S12_xPool_down	S24_xPool_down
13394	unknown		hypothetical protein		R12_xPool_down
15160	unknown		hypothetical protein		R12_xPool_down
15972	unknown		hypothetical protein		R12_xPool_down	R24_xPool_down	S96_xPool_down
18878	unknown		hypothetical protein		R12_xPool_down	R24_xPool_down	RxS_24_up	RxS_96_up	S12_xPool_down
19653	unknown		hypothetical protein		R12_xPool_down	S24_xPool_down
21217	unknown		hypothetical protein	Secreted	R12_xPool_down	R24_xPool_down	S24_xPool_down
23021	unknown		hypothetical protein		R12_xPool_down	S12_xPool_down
23919	unknown		hypothetical protein		R12_xPool_down	R24_xPool_down	S12_xPool_down
24196	unknown		hypothetical protein		R12_xPool_down	RxS_24_up
29737	unknown		hypothetical protein		R12_xPool_down	RxS_12_up	RxS_24_down	S17d_xPool_down	S24_xPool_down
2412	unknown		no hit		R12_xPool_down	S24_xPool_down
3891	unknown		no hit		R12_xPool_down	R24_xPool_down	RxS_96_up
4239	unknown		no hit		R12_xPool_down	S24_xPool_down
4510	unknown		no hit		R12_xPool_down	S12_xPool_down
4768	unknown		no hit		R12_xPool_down	RxS_12_up
6522	unknown		no hit		R12_xPool_down	R24_xPool_down	S96_xPool_down
7855	unknown		no hit		R12_xPool_down	R24_xPool_down
8026	unknown		no hit		R12_xPool_down	S12_xPool_down
9391	unknown		no hit		R12_xPool_down	R17d_xPool_down	RxS_96_down	S24_xPool_down	S96_xPool_down
10101	unknown		no hit		R12_xPool_down	R96_xPool_down	S12_xPool_down	S96_xPool_down
10105	unknown		no hit		R12_xPool_down	RxS_12_up	S17d_xPool_down	S24_xPool_down
16268	unknown		no hit		R12_xPool_down	S17d_xPool_down
16269	unknown		no hit		R12_xPool_down	R24_xPool_down	S17d_xPool_down	S24_xPool_down
18350	unknown		no hit		R12_xPool_down	R24_xPool_down	RxS_12_up	RxS_96_up
21125	unknown		no hit		R12_xPool_down	RxS_12_up
21572	unknown		no hit		R12_xPool_down	S12_xPool_down	S17d_xPool_down	S24_xPool_down	S96_xPool_down
21575	unknown		no hit	Secreted	R12_xPool_down	R24_xPool_down	S12_xPool_down	S17d_xPool_down	S24_xPool_down
22503	unknown		no hit		R12_xPool_down	S17d_xPool_down	S96_xPool_down
23186	unknown		no hit		R12_xPool_down
28024	unknown		no hit		R12_xPool_down	R24_xPool_down	S17d_xPool_down
29775	unknown		no hit		R12_xPool_down	S12_xPool_down	S17d_xPool_down
19599	unknown		Protein of unknown function (DUF3292)		R12_xPool_down
8552	unknown		Secreted	Secreted	R12_xPool_down	RxS_12_up	RxS_24_down	S24_xPool_down
22040	unknown		DUF825		R12_xPool_up	R17d_xPool_up	R24_xPool_up	R96_xPool_up	S12_xPool_up	S24_xPool_up	S96_xPool_up
2933	unknown		hypothetical protein		R12_xPool_up	R24_xPool_up	S17d_xPool_up	S24_xPool_up
4702	unknown		hypothetical protein		R12_xPool_up	S24_xPool_up
5813	unknown		hypothetical protein		R12_xPool_up	R17d_xPool_up	R96_xPool_up	S12_xPool_up	S17d_xPool_up	S24_xPool_up	S96_xPool_up
7997	unknown		hypothetical protein	Secreted	R12_xPool_up	R24_xPool_up	S12_xPool_up	S17d_xPool_up	S24_xPool_up
8326	unknown		hypothetical protein		R12_xPool_up	RxS_12_down	S96_xPool_up
8435	unknown		hypothetical protein		R12_xPool_up	R24_xPool_up	S12_xPool_up
8500	unknown		hypothetical protein		R12_xPool_up	R24_xPool_up	R96_xPool_up	S12_xPool_up	S17d_xPool_up	S96_xPool_up
10250	unknown		hypothetical protein		R12_xPool_up	R96_xPool_up	RxS_24_up	RxS_96_down	S12_xPool_up	S24_xPool_up
10388	unknown		hypothetical protein		R12_xPool_up	RxS_12_down
10581	unknown		hypothetical protein		R12_xPool_up	RxS_12_down
11492	unknown		hypothetical protein	Secreted	R12_xPool_up	S12_xPool_up
14461	unknown		hypothetical protein		R12_xPool_up	S17d_xPool_up
15450	unknown		hypothetical protein		R12_xPool_up	RxS_12_down
15558	unknown		hypothetical protein		R12_xPool_up	R24_xPool_up	S12_xPool_up
15888	unknown		hypothetical protein		R12_xPool_up
17238	unknown		hypothetical protein		R12_xPool_up
17352	unknown		hypothetical protein		R12_xPool_up	R24_xPool_up	S12_xPool_up	S24_xPool_up
17355	unknown		hypothetical protein		R12_xPool_up	R24_xPool_up	S12_xPool_up	S24_xPool_up
18763	unknown		hypothetical protein		R12_xPool_up	R24_xPool_up	R96_xPool_up	S12_xPool_up	S17d_xPool_up	S24_xPool_up	S96_xPool_up
20072	unknown		hypothetical protein		R12_xPool_up	R17d_xPool_up	S12_xPool_up
20942	unknown		hypothetical protein		R12_xPool_up	S24_xPool_up
21724	unknown		hypothetical protein	Secreted	R12_xPool_up	S12_xPool_up	S96_xPool_up
22174	unknown		hypothetical protein		R12_xPool_up
25746	unknown		hypothetical protein		R12_xPool_up	R17d_xPool_up	R96_xPool_up	RxS_12_down	S17d_xPool_up	S24_xPool_up	S96_xPool_up
28682	unknown		hypothetical protein		R12_xPool_up
1531	unknown		no hit		R12_xPool_up
3636	unknown		no hit		R12_xPool_up	S24_xPool_up
4221	unknown		no hit		R12_xPool_up	S12_xPool_up	S24_xPool_up
4835	unknown		no hit		R12_xPool_up	S12_xPool_up
7258	unknown		no hit		R12_xPool_up	S12_xPool_up
9923	unknown		no hit		R12_xPool_up	RxS_12_down
9987	unknown		no hit		R12_xPool_up	S12_xPool_up
10533	unknown		no hit		R12_xPool_up	S12_xPool_up	S24_xPool_up
10732	unknown		no hit		R12_xPool_up	S12_xPool_up
12631	unknown		no hit		R12_xPool_up	R17d_xPool_up	R24_xPool_up	S12_xPool_up	S17d_xPool_up	S24_xPool_up	S96_xPool_up
13254	unknown		no hit		R12_xPool_up	RxS_24_up	S12_xPool_up	S17d_xPool_up	S24_xPool_up	S96_xPool_up
14985	unknown		no hit		R12_xPool_up	R17d_xPool_up	S24_xPool_up	S96_xPool_up
18981	unknown		no hit		R12_xPool_up	S24_xPool_up
19828	unknown		no hit		R12_xPool_up
19829	unknown		no hit		R12_xPool_up	S12_xPool_up	S24_xPool_up
19867	unknown		no hit		R12_xPool_up	S12_xPool_up	S24_xPool_up	S96_xPool_up
21411	unknown		no hit		R12_xPool_up
24285	unknown		no hit		R12_xPool_up	R24_xPool_up	R96_xPool_up	S12_xPool_up	S17d_xPool_up	S24_xPool_up	S96_xPool_up
25153	unknown		no hit		R12_xPool_up	R24_xPool_up	S12_xPool_up	S17d_xPool_up	S24_xPool_up
27129	unknown		no hit		R12_xPool_up	S17d_xPool_up	S24_xPool_up
27917	unknown		no hit		R12_xPool_up	S12_xPool_up	S24_xPool_up
28056	unknown		no hit		R12_xPool_up	R17d_xPool_up	R96_xPool_up	RxS_17d_down	S12_xPool_up	S24_xPool_up	S96_xPool_up
28257	unknown		no hit		R12_xPool_up	S24_xPool_up
5142	unknown		Secreted	Secreted	R12_xPool_up	S12_xPool_up	S24_xPool_up	S96_xPool_up
6804	unknown		Secreted	Secreted	R12_xPool_up	R24_xPool_up	R96_xPool_up	S12_xPool_up	S24_xPool_up	S96_xPool_up
11491	unknown		Secreted	Secreted	R12_xPool_up	S12_xPool_up
11612	unknown		Secreted	Secreted	R12_xPool_up	S12_xPool_up
14143	unknown		Secreted	Secreted	R12_xPool_up	R24_xPool_up	R96_xPool_up	S12_xPool_up	S17d_xPool_up	S24_xPool_up	S96_xPool_up
17	unknown		hypothetical protein		R17d_xPool_down	R24_xPool_down	R96_xPool_down	S12_xPool_down	S24_xPool_down	S96_xPool_down
15761	unknown		hypothetical protein		R17d_xPool_down	R24_xPool_down	R96_xPool_down	RxS_12_up	S24_xPool_down	S96_xPool_down
23920	unknown		hypothetical protein		R17d_xPool_down	R96_xPool_down	RxS_24_down	RxS_96_up
570	unknown		no hit		R17d_xPool_up	R96_xPool_up	RxS_17d_down	RxS_96_down
28028	unknown		Domain of unknown function (DUF4782)		R24_xPool_down
2635	unknown		hypothetical protein		R24_xPool_down
3225	unknown		hypothetical protein		R24_xPool_down
6239	unknown		hypothetical protein		R24_xPool_down	S12_xPool_down	S24_xPool_down
7483	unknown		hypothetical protein		R24_xPool_down	S12_xPool_down
9214	unknown		hypothetical protein		R24_xPool_down	S12_xPool_down	S17d_xPool_down	S96_xPool_down
9544	unknown		hypothetical protein		R24_xPool_down	S12_xPool_down
9894	unknown		hypothetical protein		R24_xPool_down	RxS_12_up	S17d_xPool_down	S24_xPool_down
19205	unknown		hypothetical protein		R24_xPool_down	S17d_xPool_down	S24_xPool_down
19655	unknown		hypothetical protein		R24_xPool_down
19656	unknown		hypothetical protein		R24_xPool_down
21756	unknown		hypothetical protein		R24_xPool_down
24693	unknown		hypothetical protein		R24_xPool_down	S24_xPool_down	S96_xPool_down
28791	unknown		hypothetical protein		R24_xPool_down	RxS_24_up
29735	unknown		hypothetical protein		R24_xPool_down	RxS_24_up
2959	unknown		no hit		R24_xPool_down	S24_xPool_down
7804	unknown		no hit		R24_xPool_down	RxS_12_down	S12_xPool_down
7807	unknown		no hit		R24_xPool_down
12097	unknown		no hit		R24_xPool_down	S17d_xPool_down	S24_xPool_down
12351	unknown		no hit		R24_xPool_down	S12_xPool_down
15073	unknown		no hit		R24_xPool_down	RxS_96_down	S17d_xPool_down	S96_xPool_down
22156	unknown		no hit		R24_xPool_down	S12_xPool_down
8554	unknown		Secreted	Secreted	R24_xPool_down	RxS_12_up	S24_xPool_down
21128	unknown		Secreted	Secreted	R24_xPool_down	S24_xPool_down	S96_xPool_down
21130	unknown		Secreted	Secreted	R24_xPool_down	R96_xPool_down	RxS_24_up	S96_xPool_down
12062	unknown		Domain of unknown function (DUF4218)		R24_xPool_up	S12_xPool_up
2934	unknown		hypothetical protein		R24_xPool_up	S24_xPool_up
6237	unknown		hypothetical protein		R24_xPool_up	RxS_24_down
6972	unknown		hypothetical protein		R24_xPool_up	S12_xPool_up	S17d_xPool_up
10268	unknown		hypothetical protein		R24_xPool_up	S24_xPool_up
13220	unknown		hypothetical protein		R24_xPool_up	S17d_xPool_up	S24_xPool_up
15281	unknown		hypothetical protein		R24_xPool_up	R96_xPool_up	S24_xPool_up	S96_xPool_up
15594	unknown		hypothetical protein		R24_xPool_up
15676	unknown		hypothetical protein		R24_xPool_up	S12_xPool_up	S96_xPool_up
17877	unknown		hypothetical protein	Secreted	R24_xPool_up	S17d_xPool_up	S24_xPool_up	S96_xPool_up
17918	unknown		hypothetical protein		R24_xPool_up	S24_xPool_up
19333	unknown		hypothetical protein		R24_xPool_up	S24_xPool_up
19334	unknown		hypothetical protein		R24_xPool_up	S24_xPool_up	S96_xPool_up
19335	unknown		hypothetical protein		R24_xPool_up	S24_xPool_up
1078	unknown		no hit		R24_xPool_up	S17d_xPool_up	S24_xPool_up
2849	unknown		no hit		R24_xPool_up	R96_xPool_up	S17d_xPool_up	S24_xPool_up	S96_xPool_up
3105	unknown		no hit		R24_xPool_up	S12_xPool_up	S24_xPool_up
5263	unknown		no hit		R24_xPool_up
5589	unknown		no hit		R24_xPool_up
7610	unknown		no hit		R24_xPool_up
13186	unknown		no hit		R24_xPool_up	S12_xPool_up	S17d_xPool_up	S24_xPool_up
13983	unknown		no hit		R24_xPool_up
16448	unknown		no hit		R24_xPool_up	S12_xPool_up	S24_xPool_up	S96_xPool_up
20134	unknown		no hit		R24_xPool_up	S17d_xPool_up	S24_xPool_up	S96_xPool_up
21119	unknown		no hit		R24_xPool_up	S17d_xPool_up
23341	unknown		no hit		R24_xPool_up	RxS_24_down
28732	unknown		no hit		R24_xPool_up	RxS_24_down
20380	unknown		Protein of unknown function (DUF3533)		R24_xPool_up	S17d_xPool_up
12936	unknown		Protein of unknown function, DUF604		R24_xPool_up	RxS_24_down
2848	unknown		Secreted	Secreted	R24_xPool_up	S17d_xPool_up	S24_xPool_up
5591	unknown		Secreted	Secreted	R24_xPool_up	R96_xPool_up	S17d_xPool_up	S24_xPool_up	S96_xPool_up
5592	unknown		Secreted	Secreted	R24_xPool_up	S24_xPool_up
7609	unknown		Secreted	Secreted	R24_xPool_up	RxS_24_down	S12_xPool_up	S17d_xPool_up
14142	unknown		Secreted	Secreted	R24_xPool_up	S24_xPool_up	S96_xPool_up
14289	unknown		Secreted	Secreted	R24_xPool_up	S24_xPool_up	S96_xPool_up
22306	unknown		Secreted	Secreted	R24_xPool_up	R96_xPool_up	S17d_xPool_up	S24_xPool_up	S96_xPool_up
7086	unknown		hypothetical protein		R96_xPool_down
11243	unknown		hypothetical protein		R96_xPool_down	RxS_96_up
13393	unknown		hypothetical protein		R96_xPool_down	RxS_96_up
15829	unknown		hypothetical protein		R96_xPool_down
18610	unknown		hypothetical protein		R96_xPool_down	RxS_96_up
21748	unknown		hypothetical protein		R96_xPool_down	RxS_96_up
9392	unknown		no hit		R96_xPool_down
25162	unknown		no hit		R96_xPool_down
27441	unknown		Secreted	Secreted	R96_xPool_down	RxS_24_down	S96_xPool_down
20620	unknown		DUF825		R96_xPool_up	S12_xPool_up	S96_xPool_up
22041	unknown		DUF825		R96_xPool_up	S12_xPool_up	S24_xPool_up	S96_xPool_up
3346	unknown		hypothetical protein	Secreted	R96_xPool_up	S17d_xPool_up	S96_xPool_up
5473	unknown		hypothetical protein		R96_xPool_up	S96_xPool_up
8309	unknown		hypothetical protein	Secreted	R96_xPool_up	S96_xPool_up
11489	unknown		hypothetical protein		R96_xPool_up	RxS_24_up	S24_xPool_up	S96_xPool_up
18259	unknown		hypothetical protein		R96_xPool_up	S12_xPool_up	S24_xPool_up	S96_xPool_up
3497	unknown		no hit		R96_xPool_up	S24_xPool_up	S96_xPool_up
18359	unknown		no hit		R96_xPool_up	S96_xPool_up
21298	unknown		no hit		R96_xPool_up	S17d_xPool_up	S24_xPool_up	S96_xPool_up
28107	unknown		no hit		R96_xPool_up
7607	unknown		Secreted	Secreted	R96_xPool_up	RxS_24_up	S24_xPool_up	S96_xPool_up
28317	unknown		Domain of unknown function (DUF4078)		RxS_12_down	S12_xPool_down
5014	unknown		hypothetical protein		RxS_12_down	S12_xPool_down
7191	unknown		hypothetical protein		RxS_12_down	S12_xPool_down
9678	unknown		hypothetical protein		RxS_12_down	RxS_24_up	S12_xPool_down	S17d_xPool_down
12028	unknown		hypothetical protein		RxS_12_down	RxS_24_up
14976	unknown		hypothetical protein		RxS_12_down	RxS_24_down	S12_xPool_down	S24_xPool_down
17629	unknown		hypothetical protein		RxS_12_down
18295	unknown		hypothetical protein		RxS_12_down	RxS_24_down
19557	unknown		hypothetical protein		RxS_12_down	S12_xPool_down
20629	unknown		hypothetical protein		RxS_12_down
20652	unknown		hypothetical protein		RxS_12_down
22253	unknown		hypothetical protein		RxS_12_down	RxS_24_up
23528	unknown		hypothetical protein		RxS_12_down
24047	unknown		hypothetical protein		RxS_12_down	RxS_24_down	S12_xPool_down
25438	unknown		hypothetical protein		RxS_12_down	S12_xPool_down
28131	unknown		hypothetical protein		RxS_12_down	S12_xPool_down
28754	unknown		hypothetical protein		RxS_12_down	S12_xPool_down
29463	unknown		hypothetical protein		RxS_12_down
66	unknown		no hit		RxS_12_down
317	unknown		no hit		RxS_12_down
1233	unknown		no hit		RxS_12_down
4283	unknown		no hit		RxS_12_down
6711	unknown		no hit		RxS_12_down	S12_xPool_down
7820	unknown		no hit		RxS_12_down
10432	unknown		no hit		RxS_12_down
10458	unknown		no hit		RxS_12_down
13398	unknown		no hit		RxS_12_down
17043	unknown		no hit		RxS_12_down
17044	unknown		no hit		RxS_12_down	S12_xPool_down
18349	unknown		no hit		RxS_12_down	RxS_24_down	S12_xPool_down
26092	unknown		no hit		RxS_12_down
21084	unknown		Protein of unknown function (DUF837)		RxS_12_down
20924	unknown		Secreted	Secreted	RxS_12_down	RxS_96_up
28316	unknown		Domain of unknown function (DUF4078)		RxS_12_up	RxS_24_up	S12_xPool_up	S24_xPool_up
356	unknown		hypothetical protein		RxS_12_up
3006	unknown		hypothetical protein		RxS_12_up
3097	unknown		hypothetical protein		RxS_12_up
3099	unknown		hypothetical protein		RxS_12_up
3101	unknown		hypothetical protein		RxS_12_up
8754	unknown		hypothetical protein		RxS_12_up
9104	unknown		hypothetical protein		RxS_12_up
9538	unknown		hypothetical protein		RxS_12_up
9540	unknown		hypothetical protein		RxS_12_up	S12_xPool_up
9615	unknown		hypothetical protein		RxS_12_up
11110	unknown		hypothetical protein		RxS_12_up	S12_xPool_up
11355	unknown		hypothetical protein		RxS_12_up	RxS_24_down
13262	unknown		hypothetical protein		RxS_12_up
13565	unknown		hypothetical protein		RxS_12_up	S12_xPool_up
14743	unknown		hypothetical protein		RxS_12_up
15446	unknown		hypothetical protein		RxS_12_up
15447	unknown		hypothetical protein		RxS_12_up	S12_xPool_up
15806	unknown		hypothetical protein		RxS_12_up	S17d_xPool_down
16375	unknown		hypothetical protein		RxS_12_up
16415	unknown		hypothetical protein		RxS_12_up
16674	unknown		hypothetical protein		RxS_12_up
18376	unknown		hypothetical protein		RxS_12_up
18875	unknown		hypothetical protein		RxS_12_up
19594	unknown		hypothetical protein		RxS_12_up
20024	unknown		hypothetical protein		RxS_12_up	S12_xPool_up
20185	unknown		hypothetical protein		RxS_12_up	S17d_xPool_down
20438	unknown		hypothetical protein		RxS_12_up
20968	unknown		hypothetical protein		RxS_12_up
21115	unknown		hypothetical protein	Secreted	RxS_12_up	S17d_xPool_down	S24_xPool_down
22255	unknown		hypothetical protein		RxS_12_up	S12_xPool_up
22877	unknown		hypothetical protein	Secreted	RxS_12_up	S12_xPool_up
23241	unknown		hypothetical protein		RxS_12_up	S12_xPool_up
23468	unknown		hypothetical protein		RxS_12_up
24249	unknown		hypothetical protein		RxS_12_up	S24_xPool_down
24407	unknown		hypothetical protein		RxS_12_up	S12_xPool_up
24411	unknown		hypothetical protein		RxS_12_up
27172	unknown		hypothetical protein		RxS_12_up	S12_xPool_up
1149	unknown		no hit		RxS_12_up
2912	unknown		no hit		RxS_12_up	S12_xPool_up
3052	unknown		no hit		RxS_12_up
3804	unknown		no hit		RxS_12_up
4540	unknown		no hit		RxS_12_up
6447	unknown		no hit		RxS_12_up
7817	unknown		no hit		RxS_12_up
10106	unknown		no hit		RxS_12_up
11361	unknown		no hit		RxS_12_up
12209	unknown		no hit		RxS_12_up
12213	unknown		no hit		RxS_12_up
12951	unknown		no hit		RxS_12_up
13751	unknown		no hit		RxS_12_up	S12_xPool_up
14260	unknown		no hit		RxS_12_up
14748	unknown		no hit		RxS_12_up
14906	unknown		no hit		RxS_12_up	S12_xPool_up
15089	unknown		no hit		RxS_12_up
15197	unknown		no hit		RxS_12_up	S12_xPool_up
15198	unknown		no hit		RxS_12_up
15815	unknown		no hit		RxS_12_up	RxS_96_down
16871	unknown		no hit		RxS_12_up
16872	unknown		no hit		RxS_12_up	S12_xPool_up
17423	unknown		no hit		RxS_12_up
18417	unknown		no hit		RxS_12_up
19085	unknown		no hit		RxS_12_up	S12_xPool_up
19234	unknown		no hit		RxS_12_up
20927	unknown		no hit		RxS_12_up	S12_xPool_up
21112	unknown		no hit		RxS_12_up
21143	unknown		no hit		RxS_12_up
24379	unknown		no hit		RxS_12_up
26090	unknown		no hit		RxS_12_up
27321	unknown		no hit		RxS_12_up
28054	unknown		no hit		RxS_12_up
28497	unknown		no hit		RxS_12_up
29757	unknown		no hit		RxS_12_up
2068	unknown		Protein of unknown function (DUF2420)		RxS_12_up
18837	unknown		Secreted	Secreted	RxS_12_up
12655	unknown		no hit		RxS_17d_down	S17d_xPool_down
1442	unknown		hypothetical protein		RxS_24_down
2298	unknown		hypothetical protein		RxS_24_down
5652	unknown		hypothetical protein		RxS_24_down
6973	unknown		hypothetical protein		RxS_24_down
7305	unknown		hypothetical protein		RxS_24_down
7590	unknown		hypothetical protein		RxS_24_down	S24_xPool_down
9677	unknown		hypothetical protein		RxS_24_down
9997	unknown		hypothetical protein		RxS_24_down
12555	unknown		hypothetical protein		RxS_24_down	S24_xPool_down	S96_xPool_down
14096	unknown		hypothetical protein		RxS_24_down
16037	unknown		hypothetical protein		RxS_24_down
20144	unknown		hypothetical protein		RxS_24_down
20187	unknown		hypothetical protein		RxS_24_down	S17d_xPool_down	S24_xPool_down	S96_xPool_down
20418	unknown		hypothetical protein		RxS_24_down
28770	unknown		hypothetical protein		RxS_24_down
29572	unknown		hypothetical protein		RxS_24_down
514	unknown		no hit		RxS_24_down
871	unknown		no hit		RxS_24_down	S24_xPool_down
920	unknown		no hit		RxS_24_down
927	unknown		no hit		RxS_24_down
6003	unknown		no hit		RxS_24_down
7113	unknown		no hit		RxS_24_down	RxS_96_down
7749	unknown		no hit		RxS_24_down
12296	unknown		no hit		RxS_24_down
26091	unknown		no hit		RxS_24_down	S24_xPool_down
26745	unknown		no hit		RxS_24_down
27135	unknown		no hit		RxS_24_down	S12_xPool_down	S17d_xPool_down	S24_xPool_down
20686	unknown		Protein of unknown function DUF89		RxS_24_down
12932	unknown		Protein of unknown function, DUF604		RxS_24_down
5100	unknown		DUF946		RxS_24_up	S12_xPool_up	S24_xPool_up	S96_xPool_up
1261	unknown		hypothetical protein		RxS_24_up
1845	unknown		hypothetical protein		RxS_24_up
2892	unknown		hypothetical protein	Secreted	RxS_24_up
4964	unknown		hypothetical protein		RxS_24_up
5375	unknown		hypothetical protein		RxS_24_up
9094	unknown		hypothetical protein		RxS_24_up	S24_xPool_up
9148	unknown		hypothetical protein		RxS_24_up
9616	unknown		hypothetical protein		RxS_24_up
10387	unknown		hypothetical protein		RxS_24_up	S24_xPool_up
11242	unknown		hypothetical protein		RxS_24_up
11354	unknown		hypothetical protein		RxS_24_up
12080	unknown		hypothetical protein		RxS_24_up
12768	unknown		hypothetical protein		RxS_24_up
13302	unknown		hypothetical protein		RxS_24_up	S17d_xPool_down
13620	unknown		hypothetical protein		RxS_24_up
14629	unknown		hypothetical protein		RxS_24_up
15946	unknown		hypothetical protein		RxS_24_up
16200	unknown		hypothetical protein		RxS_24_up
17557	unknown		hypothetical protein		RxS_24_up	S24_xPool_up
18918	unknown		hypothetical protein		RxS_24_up	RxS_96_down
19873	unknown		hypothetical protein		RxS_24_up
20628	unknown		hypothetical protein		RxS_24_up
21614	unknown		hypothetical protein		RxS_24_up
22087	unknown		hypothetical protein		RxS_24_up
25223	unknown		hypothetical protein		RxS_24_up
25964	unknown		hypothetical protein		RxS_24_up
27099	unknown		hypothetical protein		RxS_24_up
2709	unknown		no hit		RxS_24_up
3784	unknown		no hit		RxS_24_up
5877	unknown		no hit		RxS_24_up
10357	unknown		no hit		RxS_24_up
10409	unknown		no hit		RxS_24_up
12721	unknown		no hit		RxS_24_up
14256	unknown		no hit		RxS_24_up
15065	unknown		no hit		RxS_24_up
15369	unknown		no hit		RxS_24_up
17666	unknown		no hit		RxS_24_up	S24_xPool_up
19938	unknown		no hit		RxS_24_up
20419	unknown		no hit		RxS_24_up
23177	unknown		no hit		RxS_24_up
23580	unknown		no hit		RxS_24_up	S17d_xPool_up	S24_xPool_up
23622	unknown		no hit		RxS_24_up	S17d_xPool_up	S24_xPool_up
25650	unknown		no hit		RxS_24_up
25890	unknown		no hit		RxS_24_up
27087	unknown		no hit		RxS_24_up
20685	unknown		Protein of unknown function DUF89		RxS_24_up
540	unknown		hypothetical protein		RxS_96_down
3180	unknown		hypothetical protein		RxS_96_down
3443	unknown		hypothetical protein		RxS_96_down
6854	unknown		hypothetical protein		RxS_96_down	S17d_xPool_down
10386	unknown		hypothetical protein		RxS_96_down
11357	unknown		hypothetical protein		RxS_96_down	S17d_xPool_down
28102	unknown		hypothetical protein		RxS_96_down
28702	unknown		hypothetical protein		RxS_96_down
3344	unknown		no hit		RxS_96_down
7487	unknown		no hit		RxS_96_down
15183	unknown		no hit		RxS_96_down
27344	unknown		no hit		RxS_96_down
14463	unknown		Domain of unknown function (DUF4336)		RxS_96_up	S96_xPool_up
347	unknown		hypothetical protein		RxS_96_up
2383	unknown		hypothetical protein		RxS_96_up
4861	unknown		hypothetical protein		RxS_96_up
6173	unknown		hypothetical protein		RxS_96_up
6643	unknown		hypothetical protein		RxS_96_up
7901	unknown		hypothetical protein		RxS_96_up
11353	unknown		hypothetical protein		RxS_96_up	S96_xPool_up
11643	unknown		hypothetical protein		RxS_96_up
13117	unknown		hypothetical protein		RxS_96_up
14832	unknown		hypothetical protein		RxS_96_up	S24_xPool_up	S96_xPool_up
14834	unknown		hypothetical protein		RxS_96_up
25067	unknown		hypothetical protein		RxS_96_up
28031	unknown		hypothetical protein		RxS_96_up	S17d_xPool_down
4664	unknown		no hit		RxS_96_up
7923	unknown		no hit		RxS_96_up	S17d_xPool_up	S96_xPool_up
8741	unknown		no hit		RxS_96_up
13605	unknown		no hit		RxS_96_up	S12_xPool_down
15994	unknown		no hit		RxS_96_up
23133	unknown		no hit		RxS_96_up	S17d_xPool_up	S96_xPool_up
25154	unknown		no hit		RxS_96_up	S24_xPool_up
27061	unknown		no hit		RxS_96_up	S17d_xPool_down
27128	unknown		no hit		RxS_96_up
11184	unknown		Protein of unknown function (DUF2433)		RxS_96_up	S96_xPool_up
28030	unknown		Domain of unknown function (DUF4782)		S12_xPool_down
63	unknown		hypothetical protein	secreted	S12_xPool_down	S17d_xPool_down	S96_xPool_down
2963	unknown		hypothetical protein		S12_xPool_down
3375	unknown		hypothetical protein		S12_xPool_down
4533	unknown		hypothetical protein		S12_xPool_down
6644	unknown		hypothetical protein		S12_xPool_down
7263	unknown		hypothetical protein		S12_xPool_down	S24_xPool_down
11821	unknown		hypothetical protein		S12_xPool_down
12626	unknown		hypothetical protein		S12_xPool_down	S17d_xPool_down
15803	unknown		hypothetical protein		S12_xPool_down	S17d_xPool_down
17173	unknown		hypothetical protein		S12_xPool_down	S24_xPool_down
19236	unknown		hypothetical protein		S12_xPool_down	S17d_xPool_down
24357	unknown		hypothetical protein		S12_xPool_down
24707	unknown		hypothetical protein		S12_xPool_down
27239	unknown		hypothetical protein		S12_xPool_down
3130	unknown		no hit		S12_xPool_down
7062	unknown		no hit		S12_xPool_down
17643	unknown		no hit		S12_xPool_down	S17d_xPool_down	S24_xPool_down
21019	unknown		no hit		S12_xPool_down
22501	unknown		no hit		S12_xPool_down
25771	unknown		no hit		S12_xPool_down	S24_xPool_down
29416	unknown		no hit		S12_xPool_down	S24_xPool_down
4471	unknown		Protein of unknown function (DUF3915)		S12_xPool_down	S17d_xPool_down	S96_xPool_down
7957	unknown		Secreted	Secreted	S12_xPool_down	S24_xPool_down
11013	unknown		Secreted	Secreted	S12_xPool_down	S17d_xPool_down	S24_xPool_down
23416	unknown		Secreted	Secreted	S12_xPool_down
2896	unknown		Fungal family of unknown function (DUF1776)		S12_xPool_up
6172	unknown		Fungal family of unknown function (DUF1776)		S12_xPool_up
24791	unknown		Fungal family of unknown function (DUF1776)		S12_xPool_up
1148	unknown		hypothetical protein		S12_xPool_up
1777	unknown		hypothetical protein		S12_xPool_up
9062	unknown		hypothetical protein		S12_xPool_up
11352	unknown		hypothetical protein		S12_xPool_up
13102	unknown		hypothetical protein		S12_xPool_up
15284	unknown		hypothetical protein		S12_xPool_up
16379	unknown		hypothetical protein		S12_xPool_up	S17d_xPool_up
24213	unknown		hypothetical protein		S12_xPool_up
26603	unknown		hypothetical protein		S12_xPool_up
897	unknown		no hit	Secreted	S12_xPool_up
1130	unknown		no hit		S12_xPool_up
10102	unknown		no hit		S12_xPool_up
10656	unknown		no hit		S12_xPool_up
12810	unknown		no hit		S12_xPool_up
14374	unknown		no hit		S12_xPool_up
14579	unknown		no hit		S12_xPool_up
16049	unknown		no hit		S12_xPool_up
25152	unknown		no hit		S12_xPool_up
27127	unknown		no hit		S12_xPool_up
6377	unknown		Protein of unknown function (DUF1295)		S12_xPool_up	S24_xPool_up
26006	unknown		Domain of unknown function (DUF4965)		S17d_xPool_down
26009	unknown		Domain of unknown function (DUF4965)		S17d_xPool_down
26005	unknown		Domain of unknown function (DUF5127)		S17d_xPool_down
8501	unknown		Domain of unknown function DUF21		S17d_xPool_down
1644	unknown		hypothetical protein		S17d_xPool_down	S24_xPool_down
3608	unknown		hypothetical protein		S17d_xPool_down	S24_xPool_down
3675	unknown		hypothetical protein		S17d_xPool_down
5908	unknown		hypothetical protein		S17d_xPool_down
6165	unknown		hypothetical protein		S17d_xPool_down
6167	unknown		hypothetical protein		S17d_xPool_down
6261	unknown		hypothetical protein		S17d_xPool_down
6540	unknown		hypothetical protein	Secreted	S17d_xPool_down
6739	unknown		hypothetical protein		S17d_xPool_down
6867	unknown		hypothetical protein		S17d_xPool_down
8610	unknown		hypothetical protein		S17d_xPool_down
9243	unknown		hypothetical protein		S17d_xPool_down
9676	unknown		hypothetical protein		S17d_xPool_down
10424	unknown		hypothetical protein		S17d_xPool_down	S24_xPool_down
10425	unknown		hypothetical protein		S17d_xPool_down
10934	unknown		hypothetical protein		S17d_xPool_down
11245	unknown		hypothetical protein		S17d_xPool_down
11246	unknown		hypothetical protein		S17d_xPool_down
13306	unknown		hypothetical protein		S17d_xPool_down
14243	unknown		hypothetical protein		S17d_xPool_down
16869	unknown		hypothetical protein		S17d_xPool_down
19151	unknown		hypothetical protein		S17d_xPool_down
22573	unknown		hypothetical protein		S17d_xPool_down
23469	unknown		hypothetical protein		S17d_xPool_down
23962	unknown		hypothetical protein		S17d_xPool_down
24490	unknown		hypothetical protein		S17d_xPool_down
26228	unknown		hypothetical protein		S17d_xPool_down
28129	unknown		hypothetical protein		S17d_xPool_down
28130	unknown		hypothetical protein		S17d_xPool_down
28703	unknown		hypothetical protein		S17d_xPool_down
28870	unknown		hypothetical protein		S17d_xPool_down
29460	unknown		hypothetical protein	Secreted	S17d_xPool_down
497	unknown		no hit		S17d_xPool_down
4165	unknown		no hit		S17d_xPool_down
4665	unknown		no hit		S17d_xPool_down
5716	unknown		no hit		S17d_xPool_down
6022	unknown		no hit		S17d_xPool_down
6650	unknown		no hit		S17d_xPool_down
9922	unknown		no hit		S17d_xPool_down
9926	unknown		no hit		S17d_xPool_down
11248	unknown		no hit		S17d_xPool_down
13297	unknown		no hit		S17d_xPool_down
13395	unknown		no hit		S17d_xPool_down
13402	unknown		no hit		S17d_xPool_down
14265	unknown		no hit		S17d_xPool_down
14728	unknown		no hit		S17d_xPool_down
16156	unknown		no hit		S17d_xPool_down
16649	unknown		no hit		S17d_xPool_down
17796	unknown		no hit		S17d_xPool_down
17983	unknown		no hit		S17d_xPool_down
18091	unknown		no hit		S17d_xPool_down
20471	unknown		no hit		S17d_xPool_down
22155	unknown		no hit		S17d_xPool_down
22560	unknown		no hit		S17d_xPool_down
26093	unknown		no hit		S17d_xPool_down
26430	unknown		no hit		S17d_xPool_down
26556	unknown		no hit		S17d_xPool_down
26824	unknown		no hit		S17d_xPool_down
28127	unknown		no hit		S17d_xPool_down
28706	unknown		no hit		S17d_xPool_down
3237	unknown		Protein of unknown function (DUF3684)		S17d_xPool_down
6278	unknown		Secreted	Secreted	S17d_xPool_down
7689	unknown		Secreted	Secreted	S17d_xPool_down
10134	unknown		Secreted	Secreted	S17d_xPool_down
17684	unknown		Secreted	Secreted	S17d_xPool_down
3347	unknown		hypothetical protein	Secreted	S17d_xPool_up	S96_xPool_up
3559	unknown		hypothetical protein	Secreted	S17d_xPool_up	S96_xPool_up
5248	unknown		hypothetical protein		S17d_xPool_up
6698	unknown		hypothetical protein		S17d_xPool_up
6920	unknown		hypothetical protein		S17d_xPool_up
8766	unknown		hypothetical protein	Secreted	S17d_xPool_up	S96_xPool_up
9984	unknown		hypothetical protein	Secreted	S17d_xPool_up
10720	unknown		hypothetical protein		S17d_xPool_up
10721	unknown		hypothetical protein		S17d_xPool_up
13198	unknown		hypothetical protein		S17d_xPool_up
14924	unknown		hypothetical protein		S17d_xPool_up	S96_xPool_up
16031	unknown		hypothetical protein		S17d_xPool_up
16241	unknown		hypothetical protein		S17d_xPool_up
16264	unknown		hypothetical protein		S17d_xPool_up	S24_xPool_up
16773	unknown		hypothetical protein		S17d_xPool_up
18066	unknown		hypothetical protein		S17d_xPool_up
18846	unknown		hypothetical protein		S17d_xPool_up	S96_xPool_up
21116	unknown		hypothetical protein		S17d_xPool_up	S24_xPool_up
24692	unknown		hypothetical protein		S17d_xPool_up
25194	unknown		hypothetical protein		S17d_xPool_up
25750	unknown		hypothetical protein		S17d_xPool_up
27574	unknown		hypothetical protein		S17d_xPool_up
27700	unknown		hypothetical protein		S17d_xPool_up
29013	unknown		hypothetical protein		S17d_xPool_up
761	unknown		no hit		S17d_xPool_up
1059	unknown		no hit		S17d_xPool_up
1452	unknown		no hit		S17d_xPool_up	S96_xPool_up
1864	unknown		no hit		S17d_xPool_up	S96_xPool_up
1869	unknown		no hit		S17d_xPool_up
2117	unknown		no hit		S17d_xPool_up
3008	unknown		no hit		S17d_xPool_up
3024	unknown		no hit		S17d_xPool_up
3068	unknown		no hit		S17d_xPool_up
3521	unknown		no hit		S17d_xPool_up
3577	unknown		no hit		S17d_xPool_up
3709	unknown		no hit		S17d_xPool_up
3734	unknown		no hit		S17d_xPool_up
3756	unknown		no hit		S17d_xPool_up
3760	unknown		no hit		S17d_xPool_up
3839	unknown		no hit		S17d_xPool_up
3953	unknown		no hit		S17d_xPool_up
5098	unknown		no hit		S17d_xPool_up
5148	unknown		no hit		S17d_xPool_up
5539	unknown		no hit		S17d_xPool_up
5763	unknown		no hit		S17d_xPool_up
6864	unknown		no hit		S17d_xPool_up
7004	unknown		no hit		S17d_xPool_up
7005	unknown		no hit		S17d_xPool_up
7715	unknown		no hit		S17d_xPool_up
7994	unknown		no hit		S17d_xPool_up
8603	unknown		no hit		S17d_xPool_up
9325	unknown		no hit		S17d_xPool_up
9709	unknown		no hit		S17d_xPool_up
9937	unknown		no hit		S17d_xPool_up
10356	unknown		no hit		S17d_xPool_up
11348	unknown		no hit		S17d_xPool_up
11551	unknown		no hit		S17d_xPool_up
11703	unknown		no hit		S17d_xPool_up
12271	unknown		no hit		S17d_xPool_up
12837	unknown		no hit		S17d_xPool_up
13376	unknown		no hit		S17d_xPool_up
14132	unknown		no hit		S17d_xPool_up
14827	unknown		no hit		S17d_xPool_up
14828	unknown		no hit		S17d_xPool_up
16504	unknown		no hit		S17d_xPool_up
16505	unknown		no hit		S17d_xPool_up
17218	unknown		no hit		S17d_xPool_up	S96_xPool_up
17219	unknown		no hit		S17d_xPool_up	S96_xPool_up
17464	unknown		no hit		S17d_xPool_up
18002	unknown		no hit		S17d_xPool_up
18731	unknown		no hit		S17d_xPool_up
18983	unknown		no hit		S17d_xPool_up
19166	unknown		no hit		S17d_xPool_up
19311	unknown		no hit		S17d_xPool_up
19530	unknown		no hit		S17d_xPool_up
19741	unknown		no hit		S17d_xPool_up
19998	unknown		no hit		S17d_xPool_up
20497	unknown		no hit		S17d_xPool_up
20790	unknown		no hit		S17d_xPool_up
20815	unknown		no hit		S17d_xPool_up
20880	unknown		no hit		S17d_xPool_up
21510	unknown		no hit		S17d_xPool_up
21548	unknown		no hit		S17d_xPool_up
21583	unknown		no hit		S17d_xPool_up
21655	unknown		no hit		S17d_xPool_up
23639	unknown		no hit		S17d_xPool_up	S96_xPool_up
23879	unknown		no hit		S17d_xPool_up
24423	unknown		no hit		S17d_xPool_up
24448	unknown		no hit		S17d_xPool_up
25132	unknown		no hit		S17d_xPool_up
25683	unknown		no hit		S17d_xPool_up
26265	unknown		no hit		S17d_xPool_up	S24_xPool_up	S96_xPool_up
26278	unknown		no hit		S17d_xPool_up
26347	unknown		no hit		S17d_xPool_up	S24_xPool_up
26367	unknown		no hit		S17d_xPool_up
27535	unknown		no hit		S17d_xPool_up
27537	unknown		no hit		S17d_xPool_up
27538	unknown		no hit		S17d_xPool_up
28258	unknown		no hit		S17d_xPool_up
28723	unknown		no hit		S17d_xPool_up
663	unknown		Secreted	Secreted	S17d_xPool_up	S96_xPool_up
3025	unknown		Secreted	Secreted	S17d_xPool_up
6318	unknown		Secreted	Secreted	S17d_xPool_up
6981	unknown		Secreted	Secreted	S17d_xPool_up
6982	unknown		Secreted	Secreted	S17d_xPool_up
8074	unknown		Secreted	Secreted	S17d_xPool_up
8751	unknown		Secreted		S17d_xPool_up
9111	unknown		Secreted	Secreted	S17d_xPool_up
10025	unknown		Secreted	Secreted	S17d_xPool_up
10555	unknown		Secreted	Secreted	S17d_xPool_up
10829	unknown		Secreted	Secreted	S17d_xPool_up	S96_xPool_up
12407	unknown		Secreted	Secreted	S17d_xPool_up
12609	unknown		Secreted	Secreted	S17d_xPool_up
12698	unknown		Secreted	Secreted	S17d_xPool_up
13647	unknown		Secreted	Secreted	S17d_xPool_up
13907	unknown		Secreted	Secreted	S17d_xPool_up
14920	unknown		Secreted	Secreted	S17d_xPool_up	S96_xPool_up
16658	unknown		Secreted	Secreted	S17d_xPool_up
17892	unknown		Secreted	Secreted	S17d_xPool_up
18357	unknown		Secreted	Secreted	S17d_xPool_up
19094	unknown		Secreted	Secreted	S17d_xPool_up
19742	unknown		Secreted	Secreted	S17d_xPool_up
19805	unknown		Secreted	Secreted	S17d_xPool_up
20806	unknown		Secreted	Secreted	S17d_xPool_up
21122	unknown		Secreted	Secreted	S17d_xPool_up
21642	unknown		Secreted	Secreted	S17d_xPool_up
22397	unknown		Secreted	Secreted	S17d_xPool_up
25133	unknown		Secreted	Secreted	S17d_xPool_up
26222	unknown		Secreted	Secreted	S17d_xPool_up
27282	unknown		Secreted	Secreted	S17d_xPool_up
28044	unknown		Secreted	Secreted	S17d_xPool_up
28045	unknown		Secreted	Secreted	S17d_xPool_up
62	unknown		hypothetical protein	secreted	S24_xPool_down
4292	unknown		hypothetical protein		S24_xPool_down
8753	unknown		hypothetical protein		S24_xPool_down
13193	unknown		hypothetical protein		S24_xPool_down
14246	unknown		hypothetical protein		S24_xPool_down
21576	unknown		hypothetical protein		S24_xPool_down	S96_xPool_down
4029	unknown		no hit		S24_xPool_down
10724	unknown		no hit		S24_xPool_down
10826	unknown		no hit		S24_xPool_down
22347	unknown		no hit		S24_xPool_down
28665	unknown		no hit		S24_xPool_down
25761	unknown		Secreted	Secreted	S24_xPool_down
5101	unknown		DUF946		S24_xPool_up
10006	unknown		hypothetical protein	Secreted	S24_xPool_up
11488	unknown		hypothetical protein	Secreted	S24_xPool_up	S96_xPool_up
11979	unknown		hypothetical protein		S24_xPool_up	S96_xPool_up
12556	unknown		hypothetical protein		S24_xPool_up	S96_xPool_up
14566	unknown		hypothetical protein		S24_xPool_up
14836	unknown		hypothetical protein		S24_xPool_up
16634	unknown		hypothetical protein		S24_xPool_up
20145	unknown		hypothetical protein		S24_xPool_up
20189	unknown		hypothetical protein		S24_xPool_up
21587	unknown		hypothetical protein	Secreted	S24_xPool_up
1314	unknown		no hit		S24_xPool_up	S96_xPool_up
6638	unknown		no hit		S24_xPool_up
7388	unknown		no hit		S24_xPool_up
13401	unknown		no hit		S24_xPool_up
14244	unknown		no hit		S24_xPool_up
19216	unknown		no hit		S24_xPool_up
[truncated: 42 more rows]
