# Supplementary material
Source: MDPI journal article supplement (https://www.mdpi.com/2073-4395/12/2/444)
Supplement: s1 [file s1 › Table S2 proof.xlsx]

## Sheet: Co-expressed_genes
Table S2. Transcripts identified in a co-expression network with transcript 2156.
Annotation	ID	Secreted?			non-secreted	secreted
Amino sugar and nucleotide sugar metabolism	26249	Secreted		RNA metabolism	1	0
Carbohydrate metabolism	18936	Secreted		Secondary metablism	1	0
Carbohydrate metabolism	3842	Secreted		Amino sugar and nucleotide sugar metabolism	1	1
Carbohydrate metabolism	27821			Cytoskeleton and vesicle trafficking	2	0
Carbohydrate metabolism	5490			Lipid metabolism	2	0
Carbohydrate metabolism	5525			DNA metabolism	3	0
Carbohydrate metabolism	8461			Oxidative phosphorylation	3	0
Carbohydrate metabolism	12527			Cell wall metabolism	3	2
Carbohydrate metabolism	13000			Nitrogen metabolism	4	0
Carbohydrate metabolism	14380			Transposable element	4	0
Carbohydrate metabolism	17755			Signal transduction	5	0
Carbohydrate metabolism	18748			Transport	5	0
Carbohydrate metabolism	25022			Redox	5	1
Carbohydrate metabolism	26407			others	6	0
Carbohydrate metabolism	27820			Carbohydrate metabolism	12	2
Cell wall metabolism	6156	Secreted		Protein metabolism	30	0
Cell wall metabolism	13252	Secreted		unknown	95	24
Cell wall metabolism	714
Cell wall metabolism	6534
Cell wall metabolism	29377
Cytoskeleton and vesicle trafficking	7627
Cytoskeleton and vesicle trafficking	6496
DNA metabolism	12506
DNA metabolism	14850
DNA metabolism	18584
Lipid metabolism	9438
Lipid metabolism	15792
Lipid metabolism	29014
Nitrogen metabolism	4425
Nitrogen metabolism	8045
Nitrogen metabolism	20400
Nitrogen metabolism	22603
others	213
others	3477
others	17587
others	19753
others	24678
others	25102
Oxidative phosphorylation	10836
Oxidative phosphorylation	14599
Oxidative phosphorylation	26202
Protein metabolism	3199
Protein metabolism	3825
Protein metabolism	4394
Protein metabolism	4933
Protein metabolism	5535
Protein metabolism	5953
Protein metabolism	6769
Protein metabolism	6994
Protein metabolism	7170
Protein metabolism	7679
Protein metabolism	7843
Protein metabolism	8020
Protein metabolism	8089
Protein metabolism	9147
Protein metabolism	9856
Protein metabolism	11257
Protein metabolism	11380
Protein metabolism	11795
Protein metabolism	14197
Protein metabolism	18239
Protein metabolism	18493
Protein metabolism	18657
Protein metabolism	19444
Protein metabolism	19445
Protein metabolism	20779
Protein metabolism	21637
Protein metabolism	23166
Protein metabolism	23190
Protein metabolism	24531
Protein metabolism	29210
Redox	28674	Secreted
Redox	6911
redox	8698
redox	8699
redox	19605
redox	20845
RNA metabolism	10256
Secondary metablism	21047
Signal transduction	92
Signal transduction	3732
Signal transduction	13991
Signal transduction	19270
Signal transduction	19544
Transport	7735
Transport	1798
Transport	8285
Transport	10487
Transport	17735
Transposable element	18465
Transposable element	3707
Transposable element	20123
Transposable element	24451
unknown	14289	Secreted
unknown	17877	Secreted
unknown	19094	Secreted
unknown	26434	Secreted
unknown	4926	Secreted
unknown	5747	Secreted
unknown	7473	Secreted
unknown	7606	Secreted
unknown	11234	Secreted
unknown	11603	Secreted
unknown	12089	Secreted
unknown	13294	Secreted
unknown	14661	Secreted
unknown	16484	Secreted
unknown	19379	Secreted
unknown	20153	Secreted
unknown	20177	Secreted
unknown	20236	Secreted
unknown	21901	Secreted
unknown	21923	Secreted
unknown	25643	Secreted
unknown	26796	Secreted
unknown	29714	Secreted
unknown	29755	Secreted
unknown	1314
unknown	5263
unknown	5588
unknown	6167
unknown	10268
unknown	10357
unknown	16264
unknown	17879
unknown	19216
unknown	19333
unknown	19334
unknown	19530
unknown	20498
unknown	26265
unknown	157
unknown	635
unknown	2156
unknown	2189
unknown	3596
unknown	3805
unknown	4243
unknown	4379
unknown	4496
unknown	4523
unknown	4545
unknown	4927
unknown	5239
unknown	5240
unknown	5575
unknown	5592
unknown	5645
unknown	6154
unknown	6234
unknown	6685
unknown	6848
unknown	7011
unknown	7024
unknown	7264
unknown	7387
unknown	7557
unknown	7610
unknown	8290
unknown	8403
unknown	8445
unknown	9169
unknown	9393
unknown	10267
unknown	10972
unknown	11966
unknown	12088
unknown	12634
unknown	12987
unknown	13178
unknown	13248
unknown	13651
unknown	13676
unknown	14111
unknown	14189
unknown	14324
unknown	14366
unknown	14373
unknown	14418
unknown	14738
unknown	15072
unknown	15212
unknown	15960
unknown	16485
unknown	16629
unknown	17596
unknown	17780
unknown	17795
unknown	19761
unknown	20368
unknown	20403
unknown	21327
unknown	21696
unknown	22637
unknown	22717
unknown	22843
unknown	22997
unknown	23272
unknown	23582
unknown	23830
unknown	23831
unknown	26347
unknown	27086
unknown	27360
unknown	27595
unknown	27741
unknown	27773
unknown	27872
unknown	28721
unknown	29143
unknown	29443
unknown	29537
